# Supplementary material for: Aqueous Macrophages Contribute to Conserved CCL2 and CXCL10 Gradients in Uveitis
Source: PubMed Central journal article supplement — Ophthalmol Sci. 2023 Dec 14;4(4):100453. doi: 10.1016/j.xops.2023.100453 (PMC11033188; doi:10.1016/j.xops.2023.100453), 2023-12-14
Supplement: mmc2.pdf [file mmc2.pdf]

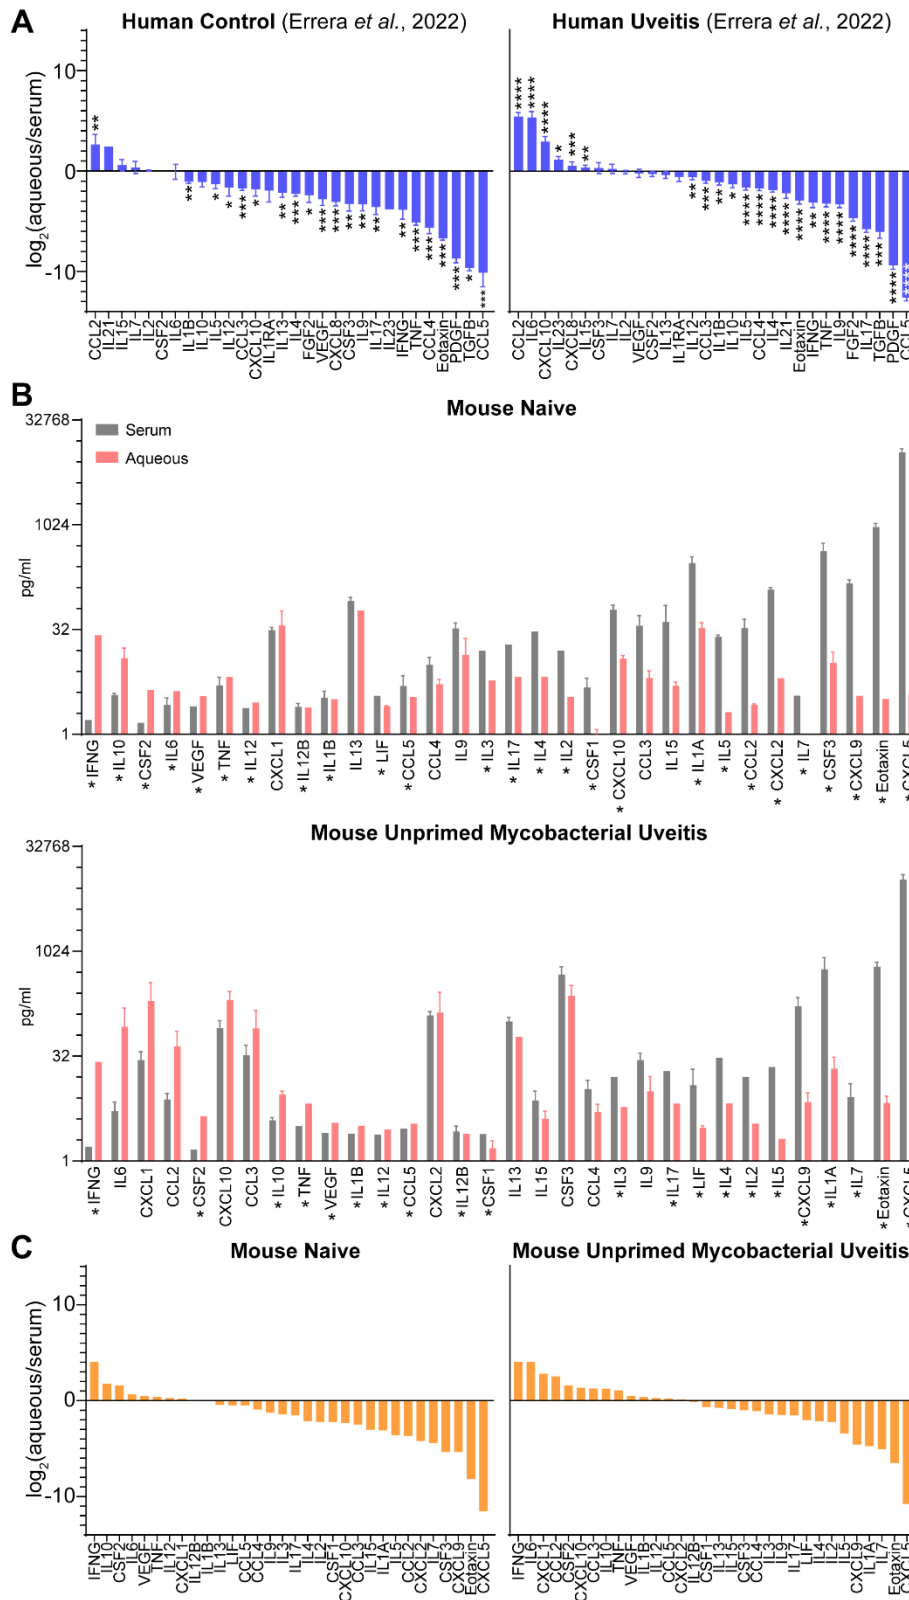

**Supplemental Figure 3. CCL2 and CXCL10 are aqueous-enriched in another cohort of uveitis patients and in a murine model of uveitis** (A) Aqueous-to-serum cytokine ratios from Errera and colleague's previous publication on a cohort of healthy patients and a cohort of uveitis patients. We assessed for enrichment in either tissue using Wilcoxon matched-pairs signed rank test. (B) Aqueous and serum protein concentrations in naïve mice and murine unprimed mycobacterial uveitis. Each bar is the mean  $\pm$  SEM for  $n=5-9$  samples. Each aqueous sample is a pooled sample from 5 mice whereas each serum sample is from an individual animal. (C) Aqueous-to-serum cytokine ratios in murine uveitis. Statistical significance is indicated as follows: \*,  $p<0.05$ ; \*\*,  $p<0.01$ ; \*\*\*,  $p<0.001$ ; and \*\*\*\*,  $p<0.0001$ .
