# Supplementary material for: Aqueous Macrophages Contribute to Conserved CCL2 and CXCL10 Gradients in Uveitis
Source: PubMed Central journal article supplement — Ophthalmol Sci. 2023 Dec 14;4(4):100453. doi: 10.1016/j.xops.2023.100453 (PMC11033188; doi:10.1016/j.xops.2023.100453), 2023-12-14
Supplement: mmc3.pdf [file mmc3.pdf]

**Supplemental table 1. Marker genes for scRNA-Seq cell populations.**

| Column1   | p_val   | avg_log2FC | pct.1   | pct.2   | p_val_adj | cluster | gene      |
|-----------|---------|------------|---------|---------|-----------|---------|-----------|
| MS4A1     | 0.0E+00 | 4.6E+00    | 9.9E-01 | 2.2E-02 | 0.0E+00   | B       | MS4A1     |
| CD79A     | 0.0E+00 | 4.1E+00    | 9.9E-01 | 2.1E-02 | 0.0E+00   | B       | CD79A     |
| HLA-DRA   | 0.0E+00 | 3.1E+00    | 1.0E+00 | 4.2E-01 | 0.0E+00   | B       | HLA-DRA   |
| BANK1     | 0.0E+00 | 3.0E+00    | 9.2E-01 | 1.3E-02 | 0.0E+00   | B       | BANK1     |
| SPIB      | 0.0E+00 | 2.8E+00    | 8.0E-01 | 1.0E-02 | 0.0E+00   | B       | SPIB      |
| MEF2C     | 0.0E+00 | 2.8E+00    | 8.9E-01 | 5.0E-02 | 0.0E+00   | B       | MEF2C     |
| HLA-DQA1  | 0.0E+00 | 2.7E+00    | 9.9E-01 | 2.5E-01 | 0.0E+00   | B       | HLA-DQA1  |
| CD74      | 0.0E+00 | 2.7E+00    | 1.0E+00 | 9.3E-01 | 0.0E+00   | B       | CD74      |
| HLA-DPB1  | 0.0E+00 | 2.7E+00    | 1.0E+00 | 6.2E-01 | 0.0E+00   | B       | HLA-DPB1  |
| HLA-DQB1  | 0.0E+00 | 2.5E+00    | 9.9E-01 | 3.4E-01 | 0.0E+00   | B       | HLA-DQB1  |
| CD19      | 0.0E+00 | 2.4E+00    | 7.6E-01 | 4.0E-03 | 0.0E+00   | B       | CD19      |
| HLA-DPA1  | 0.0E+00 | 2.4E+00    | 1.0E+00 | 6.3E-01 | 0.0E+00   | B       | HLA-DPA1  |
| SMIM14    | 0.0E+00 | 2.3E+00    | 7.8E-01 | 8.4E-02 | 0.0E+00   | B       | SMIM14    |
| HLA-DRB1  | 0.0E+00 | 2.3E+00    | 1.0E+00 | 5.8E-01 | 0.0E+00   | B       | HLA-DRB1  |
| RALGPS2   | 0.0E+00 | 2.3E+00    | 7.3E-01 | 1.4E-02 | 0.0E+00   | B       | RALGPS2   |
| POU2F2    | 0.0E+00 | 2.3E+00    | 8.6E-01 | 1.7E-01 | 0.0E+00   | B       | POU2F2    |
| CD79B     | 0.0E+00 | 2.3E+00    | 8.8E-01 | 1.3E-01 | 0.0E+00   | B       | CD79B     |
| FCRLA     | 0.0E+00 | 2.2E+00    | 7.4E-01 | 2.0E-03 | 0.0E+00   | B       | FCRLA     |
| LINC00926 | 0.0E+00 | 2.2E+00    | 6.8E-01 | 3.0E-03 | 0.0E+00   | B       | LINC00926 |
| IGHA1     | 0.0E+00 | 2.2E+00    | 6.7E-01 | 1.0E-02 | 0.0E+00   | B       | IGHA1     |
| CCDC50    | 0.0E+00 | 2.1E+00    | 7.3E-01 | 9.9E-02 | 0.0E+00   | B       | CCDC50    |
| FCRL4     | 0.0E+00 | 2.1E+00    | 4.7E-01 | 1.0E-03 | 0.0E+00   | B       | FCRL4     |
| MIR155HG  | 0.0E+00 | 2.1E+00    | 6.3E-01 | 1.0E-01 | 0.0E+00   | B       | MIR155HG  |
| FCRL5     | 0.0E+00 | 2.1E+00    | 5.5E-01 | 5.0E-03 | 0.0E+00   | B       | FCRL5     |
| SYK       | 0.0E+00 | 2.1E+00    | 7.3E-01 | 5.7E-02 | 0.0E+00   | B       | SYK       |
| ACY3      | 0.0E+00 | 2.1E+00    | 2.5E-01 | 5.0E-03 | 0.0E+00   | B       | ACY3      |
| HLA-DMA   | 0.0E+00 | 2.1E+00    | 9.4E-01 | 2.7E-01 | 0.0E+00   | B       | HLA-DMA   |
| GRN       | 0.0E+00 | 2.1E+00    | 7.6E-01 | 1.9E-01 | 0.0E+00   | B       | GRN       |
| CTSH      | 0.0E+00 | 2.0E+00    | 8.6E-01 | 2.4E-01 | 0.0E+00   | B       | CTSH      |
| BLK       | 0.0E+00 | 2.0E+00    | 6.7E-01 | 1.4E-02 | 0.0E+00   | B       | BLK       |
| TNFRSF13B | 0.0E+00 | 2.0E+00    | 6.9E-01 | 9.0E-03 | 0.0E+00   | B       | TNFRSF13B |
| TCF4      | 0.0E+00 | 2.0E+00    | 7.0E-01 | 2.6E-02 | 0.0E+00   | B       | TCF4      |
| LINC02397 | 0.0E+00 | 2.0E+00    | 6.5E-01 | 2.0E-03 | 0.0E+00   | B       | LINC02397 |
| IGHM      | 0.0E+00 | 2.0E+00    | 3.9E-01 | 7.0E-03 | 0.0E+00   | B       | IGHM      |
| CD24      | 0.0E+00 | 1.9E+00    | 5.7E-01 | 1.0E-03 | 0.0E+00   | B       | CD24      |
| PKIG      | 0.0E+00 | 1.9E+00    | 6.9E-01 | 1.4E-02 | 0.0E+00   | B       | PKIG      |
| PLCG2     | 0.0E+00 | 1.9E+00    | 6.8E-01 | 5.1E-02 | 0.0E+00   | B       | PLCG2     |
| IFI30     | 0.0E+00 | 1.8E+00    | 8.9E-01 | 1.4E-01 | 0.0E+00   | B       | IFI30     |
| SCIMP     | 0.0E+00 | 1.8E+00    | 6.7E-01 | 3.8E-02 | 0.0E+00   | B       | SCIMP     |
| LYN       | 0.0E+00 | 1.8E+00    | 7.2E-01 | 7.2E-02 | 0.0E+00   | B       | LYN       |
| ARHGAP24  | 0.0E+00 | 1.8E+00    | 6.5E-01 | 1.2E-02 | 0.0E+00   | B       | ARHGAP24  |
| PLD4      | 0.0E+00 | 1.8E+00    | 5.4E-01 | 1.8E-02 | 0.0E+00   | B       | PLD4      |
| HLA-DMB   | 0.0E+00 | 1.8E+00    | 8.3E-01 | 1.5E-01 | 0.0E+00   | B       | HLA-DMB   |

|            |         |         |         |         |         |   |            |
|------------|---------|---------|---------|---------|---------|---|------------|
| SYNGR2     | 0.0E+00 | 1.8E+00 | 8.9E-01 | 3.7E-01 | 0.0E+00 | B | SYNGR2     |
| MARCH1     | 0.0E+00 | 1.8E+00 | 6.9E-01 | 4.9E-02 | 0.0E+00 | B | MARCH1     |
| HVCN1      | 0.0E+00 | 1.8E+00 | 6.7E-01 | 5.6E-02 | 0.0E+00 | B | HVCN1      |
| IRF8       | 0.0E+00 | 1.8E+00 | 6.6E-01 | 3.9E-02 | 0.0E+00 | B | IRF8       |
| STX7       | 0.0E+00 | 1.8E+00 | 7.4E-01 | 1.1E-01 | 0.0E+00 | B | STX7       |
| SWAP70     | 0.0E+00 | 1.7E+00 | 6.8E-01 | 3.5E-02 | 0.0E+00 | B | SWAP70     |
| IGHG2      | 0.0E+00 | 1.7E+00 | 6.2E-01 | 4.0E-03 | 0.0E+00 | B | IGHG2      |
| ACP5       | 0.0E+00 | 1.7E+00 | 7.7E-01 | 2.2E-01 | 0.0E+00 | B | ACP5       |
| LY86       | 0.0E+00 | 1.7E+00 | 6.7E-01 | 4.2E-02 | 0.0E+00 | B | LY86       |
| VPREB3     | 0.0E+00 | 1.7E+00 | 3.5E-01 | 1.0E-03 | 0.0E+00 | B | VPREB3     |
| BLNK       | 0.0E+00 | 1.7E+00 | 6.5E-01 | 1.3E-02 | 0.0E+00 | B | BLNK       |
| LAT2       | 0.0E+00 | 1.7E+00 | 7.2E-01 | 8.2E-02 | 0.0E+00 | B | LAT2       |
| PDLIM1     | 0.0E+00 | 1.6E+00 | 6.5E-01 | 3.9E-02 | 0.0E+00 | B | PDLIM1     |
| IGKV3-20   | 0.0E+00 | 1.6E+00 | 2.0E-01 | 1.5E-02 | 0.0E+00 | B | IGKV3-20   |
| IGKC       | 0.0E+00 | 1.6E+00 | 5.4E-01 | 1.5E-02 | 0.0E+00 | B | IGKC       |
| CHCHD10    | 0.0E+00 | 1.6E+00 | 8.4E-01 | 3.5E-01 | 0.0E+00 | B | CHCHD10    |
| IGHV4-39   | 0.0E+00 | 1.6E+00 | 1.6E-01 | 5.0E-03 | 0.0E+00 | B | IGHV4-39   |
| ADAM28     | 0.0E+00 | 1.6E+00 | 5.3E-01 | 3.8E-02 | 0.0E+00 | B | ADAM28     |
| TSPAN3     | 0.0E+00 | 1.6E+00 | 6.2E-01 | 6.3E-02 | 0.0E+00 | B | TSPAN3     |
| HHEX       | 0.0E+00 | 1.5E+00 | 5.7E-01 | 2.1E-02 | 0.0E+00 | B | HHEX       |
| HSH2D      | 0.0E+00 | 1.5E+00 | 7.2E-01 | 1.7E-01 | 0.0E+00 | B | HSH2D      |
| CD40       | 0.0E+00 | 1.5E+00 | 6.0E-01 | 3.6E-02 | 0.0E+00 | B | CD40       |
| IGHG3      | 0.0E+00 | 1.5E+00 | 3.6E-01 | 4.0E-03 | 0.0E+00 | B | IGHG3      |
| MEF2A      | 0.0E+00 | 1.5E+00 | 6.5E-01 | 1.2E-01 | 0.0E+00 | B | MEF2A      |
| POU2AF1    | 0.0E+00 | 1.5E+00 | 5.5E-01 | 1.0E-02 | 0.0E+00 | B | POU2AF1    |
| PTPN6      | 0.0E+00 | 1.5E+00 | 8.7E-01 | 3.8E-01 | 0.0E+00 | B | PTPN6      |
| TLR10      | 0.0E+00 | 1.5E+00 | 5.5E-01 | 1.1E-02 | 0.0E+00 | B | TLR10      |
| FCGR2B     | 0.0E+00 | 1.5E+00 | 6.1E-01 | 4.2E-02 | 0.0E+00 | B | FCGR2B     |
| NCF1       | 0.0E+00 | 1.4E+00 | 8.9E-01 | 3.6E-01 | 0.0E+00 | B | NCF1       |
| SYPL1      | 0.0E+00 | 1.4E+00 | 7.9E-01 | 2.4E-01 | 0.0E+00 | B | SYPL1      |
| SCPEP1     | 0.0E+00 | 1.4E+00 | 5.7E-01 | 7.1E-02 | 0.0E+00 | B | SCPEP1     |
| COBLL1     | 0.0E+00 | 1.4E+00 | 5.0E-01 | 4.0E-03 | 0.0E+00 | B | COBLL1     |
| PAX5       | 0.0E+00 | 1.4E+00 | 5.3E-01 | 1.0E-03 | 0.0E+00 | B | PAX5       |
| CYB561A3   | 0.0E+00 | 1.4E+00 | 6.7E-01 | 1.2E-01 | 0.0E+00 | B | CYB561A3   |
| FAM30A     | 0.0E+00 | 1.4E+00 | 3.1E-01 | 5.0E-03 | 0.0E+00 | B | FAM30A     |
| GAPT       | 0.0E+00 | 1.4E+00 | 5.5E-01 | 2.3E-02 | 0.0E+00 | B | GAPT       |
| BASP1      | 0.0E+00 | 1.4E+00 | 5.3E-01 | 3.2E-02 | 0.0E+00 | B | BASP1      |
| PNOC       | 0.0E+00 | 1.4E+00 | 5.2E-01 | 6.0E-03 | 0.0E+00 | B | PNOC       |
| CD22       | 0.0E+00 | 1.4E+00 | 4.7E-01 | 2.0E-03 | 0.0E+00 | B | CD22       |
| TNFRSF13C  | 0.0E+00 | 1.4E+00 | 5.0E-01 | 6.0E-03 | 0.0E+00 | B | TNFRSF13C  |
| AC104699.1 | 0.0E+00 | 1.4E+00 | 4.8E-01 | 4.0E-03 | 0.0E+00 | B | AC104699.1 |
| LINC01781  | 0.0E+00 | 1.4E+00 | 2.7E-01 | 1.0E-03 | 0.0E+00 | B | LINC01781  |
| AFF3       | 0.0E+00 | 1.4E+00 | 4.7E-01 | 2.2E-02 | 0.0E+00 | B | AFF3       |
| FCRL2      | 0.0E+00 | 1.4E+00 | 4.5E-01 | 3.0E-03 | 0.0E+00 | B | FCRL2      |
| ID3        | 0.0E+00 | 1.4E+00 | 5.0E-01 | 6.7E-02 | 0.0E+00 | B | ID3        |
| PARP15     | 0.0E+00 | 1.4E+00 | 6.7E-01 | 1.6E-01 | 0.0E+00 | B | PARP15     |

|             |         |         |         |         |         |   |             |
|-------------|---------|---------|---------|---------|---------|---|-------------|
| TFEB        | 0.0E+00 | 1.3E+00 | 5.6E-01 | 4.6E-02 | 0.0E+00 | B | TFEB        |
| LINC01857   | 0.0E+00 | 1.3E+00 | 3.5E-01 | 2.0E-03 | 0.0E+00 | B | LINC01857   |
| BCAS4       | 0.0E+00 | 1.3E+00 | 6.1E-01 | 7.6E-02 | 0.0E+00 | B | BCAS4       |
| FGD2        | 0.0E+00 | 1.3E+00 | 5.3E-01 | 4.2E-02 | 0.0E+00 | B | FGD2        |
| CIITA       | 0.0E+00 | 1.3E+00 | 5.4E-01 | 5.8E-02 | 0.0E+00 | B | CIITA       |
| CD86        | 0.0E+00 | 1.3E+00 | 5.3E-01 | 4.8E-02 | 0.0E+00 | B | CD86        |
| BHLHE41     | 0.0E+00 | 1.3E+00 | 4.5E-01 | 9.0E-03 | 0.0E+00 | B | BHLHE41     |
| BTK         | 0.0E+00 | 1.3E+00 | 5.3E-01 | 2.7E-02 | 0.0E+00 | B | BTK         |
| RAB31       | 0.0E+00 | 1.3E+00 | 5.5E-01 | 5.3E-02 | 0.0E+00 | B | RAB31       |
| WDFY4       | 0.0E+00 | 1.3E+00 | 5.1E-01 | 2.0E-02 | 0.0E+00 | B | WDFY4       |
| CYBB        | 0.0E+00 | 1.3E+00 | 5.7E-01 | 4.6E-02 | 0.0E+00 | B | CYBB        |
| CCR1        | 0.0E+00 | 1.3E+00 | 4.2E-01 | 7.7E-02 | 0.0E+00 | B | CCR1        |
| CLECL1      | 0.0E+00 | 1.3E+00 | 5.4E-01 | 5.0E-02 | 0.0E+00 | B | CLECL1      |
| AIM2        | 0.0E+00 | 1.3E+00 | 5.2E-01 | 7.1E-02 | 0.0E+00 | B | AIM2        |
| CD180       | 0.0E+00 | 1.2E+00 | 4.9E-01 | 1.7E-02 | 0.0E+00 | B | CD180       |
| ZEB2        | 0.0E+00 | 1.2E+00 | 5.4E-01 | 1.0E-01 | 0.0E+00 | B | ZEB2        |
| CTSZ        | 0.0E+00 | 1.2E+00 | 5.7E-01 | 1.1E-01 | 0.0E+00 | B | CTSZ        |
| NEK6        | 0.0E+00 | 1.2E+00 | 4.8E-01 | 3.6E-02 | 0.0E+00 | B | NEK6        |
| IGHA2       | 0.0E+00 | 1.2E+00 | 3.2E-01 | 2.0E-03 | 0.0E+00 | B | IGHA2       |
| GPR34       | 0.0E+00 | 1.2E+00 | 3.7E-01 | 1.2E-02 | 0.0E+00 | B | GPR34       |
| PLEK        | 0.0E+00 | 1.2E+00 | 6.4E-01 | 1.5E-01 | 0.0E+00 | B | PLEK        |
| IGKV1-33    | 0.0E+00 | 1.2E+00 | 1.0E-01 | 2.0E-03 | 0.0E+00 | B | IGKV1-33    |
| IGLC3       | 0.0E+00 | 1.2E+00 | 2.0E-01 | 2.0E-03 | 0.0E+00 | B | IGLC3       |
| PXK         | 0.0E+00 | 1.1E+00 | 5.4E-01 | 9.1E-02 | 0.0E+00 | B | PXK         |
| FCHSD2      | 0.0E+00 | 1.1E+00 | 5.2E-01 | 7.5E-02 | 0.0E+00 | B | FCHSD2      |
| HLA-DOA     | 0.0E+00 | 1.1E+00 | 4.7E-01 | 4.2E-02 | 0.0E+00 | B | HLA-DOA     |
| TMEM154     | 0.0E+00 | 1.1E+00 | 6.0E-01 | 1.5E-01 | 0.0E+00 | B | TMEM154     |
| CD1C        | 0.0E+00 | 1.1E+00 | 3.5E-01 | 1.6E-02 | 0.0E+00 | B | CD1C        |
| SKAP2       | 0.0E+00 | 1.1E+00 | 5.4E-01 | 9.5E-02 | 0.0E+00 | B | SKAP2       |
| CPNE5       | 0.0E+00 | 1.1E+00 | 3.5E-01 | 1.0E-02 | 0.0E+00 | B | CPNE5       |
| PEA15       | 0.0E+00 | 1.1E+00 | 5.4E-01 | 1.1E-01 | 0.0E+00 | B | PEA15       |
| UVRAG       | 0.0E+00 | 1.1E+00 | 6.0E-01 | 1.4E-01 | 0.0E+00 | B | UVRAG       |
| SIGLEC10    | 0.0E+00 | 1.1E+00 | 4.4E-01 | 2.1E-02 | 0.0E+00 | B | SIGLEC10    |
| FCRL1       | 0.0E+00 | 1.1E+00 | 4.0E-01 | 1.0E-03 | 0.0E+00 | B | FCRL1       |
| CD83        | 0.0E+00 | 1.1E+00 | 3.4E-01 | 3.5E-02 | 0.0E+00 | B | CD83        |
| ITGAX       | 0.0E+00 | 1.1E+00 | 4.1E-01 | 4.5E-02 | 0.0E+00 | B | ITGAX       |
| CXXC5       | 0.0E+00 | 1.0E+00 | 4.2E-01 | 3.9E-02 | 0.0E+00 | B | CXXC5       |
| SYNGR1      | 0.0E+00 | 1.0E+00 | 3.8E-01 | 1.7E-02 | 0.0E+00 | B | SYNGR1      |
| PALM2-AKAP2 | 0.0E+00 | 1.0E+00 | 5.5E-01 | 1.2E-01 | 0.0E+00 | B | PALM2-AKAP2 |
| RNASE6      | 0.0E+00 | 1.0E+00 | 4.7E-01 | 6.9E-02 | 0.0E+00 | B | RNASE6      |
| SIGLEC6     | 0.0E+00 | 1.0E+00 | 3.3E-01 | 4.0E-03 | 0.0E+00 | B | SIGLEC6     |
| DOK3        | 0.0E+00 | 1.0E+00 | 4.2E-01 | 2.7E-02 | 0.0E+00 | B | DOK3        |
| SESN3       | 0.0E+00 | 1.0E+00 | 5.0E-01 | 9.0E-02 | 0.0E+00 | B | SESN3       |
| RUBCNL      | 0.0E+00 | 1.0E+00 | 3.7E-01 | 1.2E-02 | 0.0E+00 | B | RUBCNL      |
| IGHG1       | 0.0E+00 | 1.0E+00 | 5.0E-01 | 1.1E-02 | 0.0E+00 | B | IGHG1       |

|            |          |         |         |         |          |             |           |
|------------|----------|---------|---------|---------|----------|-------------|-----------|
| MPEG1      | 0.0E+00  | 1.0E+00 | 4.4E-01 | 4.2E-02 | 0.0E+00  | B           | MPEG1     |
| IGLC2      | 0.0E+00  | 1.0E+00 | 2.3E-01 | 4.0E-03 | 0.0E+00  | B           | IGLC2     |
| SSPN       | 0.0E+00  | 1.0E+00 | 3.1E-01 | 5.0E-03 | 0.0E+00  | B           | SSPN      |
| OSTN-AS1   | 0.0E+00  | 1.0E+00 | 2.9E-01 | 1.0E-03 | 0.0E+00  | B           | OSTN-AS1  |
| IGKV1-39   | 3.0E-307 | 1.1E+00 | 1.1E-01 | 5.0E-03 | 4.8E-303 | B           | IGKV1-39  |
| IGKV4-1    | 9.1E-305 | 1.2E+00 | 1.2E-01 | 6.0E-03 | 1.4E-300 | B           | IGKV4-1   |
| CD82       | 2.0E-295 | 1.4E+00 | 8.2E-01 | 3.6E-01 | 3.1E-291 | B           | CD82      |
| CD37       | 6.1E-289 | 1.2E+00 | 9.9E-01 | 9.0E-01 | 9.5E-285 | B           | CD37      |
| ORAI2      | 2.7E-279 | 1.0E+00 | 5.2E-01 | 1.3E-01 | 4.2E-275 | B           | ORAI2     |
| IGKV1-5    | 1.4E-266 | 1.5E+00 | 1.2E-01 | 7.0E-03 | 2.2E-262 | B           | IGKV1-5   |
| NCOA3      | 5.7E-263 | 1.1E+00 | 6.0E-01 | 1.7E-01 | 8.9E-259 | B           | NCOA3     |
| POLD4      | 2.1E-262 | 1.3E+00 | 9.1E-01 | 5.6E-01 | 3.3E-258 | B           | POLD4     |
| VOPP1      | 6.1E-258 | 1.3E+00 | 7.4E-01 | 3.0E-01 | 9.5E-254 | B           | VOPP1     |
| NCR3       | 9.1E-257 | 1.1E+00 | 6.4E-01 | 2.0E-01 | 1.4E-252 | B           | NCR3      |
| SH3BP5     | 1.9E-254 | 1.1E+00 | 6.4E-01 | 2.1E-01 | 3.0E-250 | B           | SH3BP5    |
| PTPN1      | 2.7E-248 | 1.1E+00 | 7.0E-01 | 2.6E-01 | 4.3E-244 | B           | PTPN1     |
| SNX2       | 1.8E-246 | 1.1E+00 | 6.9E-01 | 2.4E-01 | 2.9E-242 | B           | SNX2      |
| IGLV3-21   | 3.5E-242 | 1.5E+00 | 1.0E-01 | 5.0E-03 | 5.4E-238 | B           | IGLV3-21  |
| GRINA      | 1.9E-227 | 1.0E+00 | 6.4E-01 | 2.2E-01 | 2.9E-223 | B           | GRINA     |
| CNPY3      | 5.3E-223 | 1.1E+00 | 7.5E-01 | 3.1E-01 | 8.3E-219 | B           | CNPY3     |
| CAPG       | 9.2E-202 | 1.0E+00 | 7.8E-01 | 3.4E-01 | 1.4E-197 | B           | CAPG      |
| SP140      | 1.3E-199 | 1.0E+00 | 7.4E-01 | 3.2E-01 | 2.1E-195 | B           | SP140     |
| MOB1A      | 1.3E-178 | 1.0E+00 | 7.6E-01 | 3.8E-01 | 2.1E-174 | B           | MOB1A     |
| IGLV2-14   | 2.2E-74  | 2.0E+00 | 1.6E-01 | 4.2E-02 | 3.4E-70  | B           | IGLV2-14  |
| IGKV3-20.1 | 0.0E+00  | 7.8E+00 | 3.6E-01 | 1.8E-02 | 0.0E+00  | Plasmablast | IGKV3-20  |
| IGKV4-1.1  | 0.0E+00  | 7.7E+00 | 3.2E-01 | 7.0E-03 | 0.0E+00  | Plasmablast | IGKV4-1   |
| IGKV1-17   | 0.0E+00  | 7.7E+00 | 1.8E-01 | 2.0E-03 | 0.0E+00  | Plasmablast | IGKV1-17  |
| IGKV1-5.1  | 0.0E+00  | 7.0E+00 | 2.5E-01 | 8.0E-03 | 0.0E+00  | Plasmablast | IGKV1-5   |
| IGHG1.1    | 0.0E+00  | 6.9E+00 | 7.9E-01 | 1.9E-02 | 0.0E+00  | Plasmablast | IGHG1     |
| IGKC.1     | 0.0E+00  | 6.6E+00 | 8.1E-01 | 2.3E-02 | 0.0E+00  | Plasmablast | IGKC      |
| JCHAIN.1   | 0.0E+00  | 6.2E+00 | 9.6E-01 | 1.2E-02 | 0.0E+00  | Plasmablast | JCHAIN    |
| IGLV3-1    | 0.0E+00  | 6.1E+00 | 2.6E-01 | 5.0E-03 | 0.0E+00  | Plasmablast | IGLV3-1   |
| IGHV1-69D  | 0.0E+00  | 5.9E+00 | 2.3E-01 | 2.0E-03 | 0.0E+00  | Plasmablast | IGHV1-69D |
| IGHA1.1    | 0.0E+00  | 5.3E+00 | 6.9E-01 | 2.3E-02 | 0.0E+00  | Plasmablast | IGHA1     |
| IGHG2.1    | 0.0E+00  | 4.6E+00 | 5.3E-01 | 1.8E-02 | 0.0E+00  | Plasmablast | IGHG2     |
| IGHV1-69   | 0.0E+00  | 4.5E+00 | 1.5E-01 | 1.0E-03 | 0.0E+00  | Plasmablast | IGHV1-69  |
| IGLC2.1    | 0.0E+00  | 4.2E+00 | 2.9E-01 | 8.0E-03 | 0.0E+00  | Plasmablast | IGLC2     |
| IGLV6-57   | 0.0E+00  | 4.2E+00 | 3.7E-01 | 2.0E-03 | 0.0E+00  | Plasmablast | IGLV6-57  |
| IGLC3.1    | 0.0E+00  | 4.0E+00 | 2.3E-01 | 6.0E-03 | 0.0E+00  | Plasmablast | IGLC3     |
| MZB1       | 0.0E+00  | 3.9E+00 | 9.3E-01 | 4.5E-02 | 0.0E+00  | Plasmablast | MZB1      |
| CD79A.1    | 0.0E+00  | 3.8E+00 | 9.4E-01 | 4.1E-02 | 0.0E+00  | Plasmablast | CD79A     |
| IGHG3.1    | 0.0E+00  | 3.3E+00 | 4.5E-01 | 1.0E-02 | 0.0E+00  | Plasmablast | IGHG3     |
| DERL3      | 0.0E+00  | 3.0E+00 | 8.8E-01 | 9.0E-03 | 0.0E+00  | Plasmablast | DERL3     |
| TXNDC5     | 0.0E+00  | 2.8E+00 | 8.0E-01 | 3.5E-02 | 0.0E+00  | Plasmablast | TXNDC5    |
| IGLC1      | 0.0E+00  | 2.5E+00 | 4.6E-01 | 3.0E-03 | 0.0E+00  | Plasmablast | IGLC1     |
| IGHGP      | 0.0E+00  | 2.3E+00 | 2.2E-01 | 0.0E+00 | 0.0E+00  | Plasmablast | IGHGP     |

|            |          |         |         |         |          |             |           |
|------------|----------|---------|---------|---------|----------|-------------|-----------|
| POU2AF1.1  | 0.0E+00  | 1.7E+00 | 7.3E-01 | 2.0E-02 | 0.0E+00  | Plasmablast | POU2AF1   |
| TNFRSF17.1 | 0.0E+00  | 1.6E+00 | 6.6E-01 | 7.0E-03 | 0.0E+00  | Plasmablast | TNFRSF17  |
| SPAG4      | 0.0E+00  | 1.2E+00 | 5.5E-01 | 4.0E-03 | 0.0E+00  | Plasmablast | SPAG4     |
| ELL2       | 0.0E+00  | 1.2E+00 | 6.6E-01 | 3.2E-02 | 0.0E+00  | Plasmablast | ELL2      |
| EAF2.1     | 0.0E+00  | 1.1E+00 | 6.5E-01 | 4.3E-02 | 0.0E+00  | Plasmablast | EAF2      |
| FCRL5.1    | 0.0E+00  | 1.1E+00 | 6.2E-01 | 1.5E-02 | 0.0E+00  | Plasmablast | FCRL5     |
| PNOC.1     | 0.0E+00  | 1.0E+00 | 6.5E-01 | 1.6E-02 | 0.0E+00  | Plasmablast | PNOC      |
| IGHM.1     | 4.6E-304 | 4.7E+00 | 3.3E-01 | 1.5E-02 | 7.1E-300 | Plasmablast | IGHM      |
| IGKV1-9    | 1.3E-286 | 8.0E+00 | 1.8E-01 | 5.0E-03 | 2.0E-282 | Plasmablast | IGKV1-9   |
| IGKV3-15   | 4.0E-283 | 7.0E+00 | 2.1E-01 | 7.0E-03 | 6.2E-279 | Plasmablast | IGKV3-15  |
| MEF2C.1    | 5.0E-283 | 1.1E+00 | 6.9E-01 | 6.8E-02 | 7.9E-279 | Plasmablast | MEF2C     |
| IGHV3-7    | 3.8E-269 | 7.3E+00 | 1.6E-01 | 4.0E-03 | 6.0E-265 | Plasmablast | IGHV3-7   |
| IGHV1-46   | 5.7E-269 | 7.5E+00 | 1.3E-01 | 2.0E-03 | 8.9E-265 | Plasmablast | IGHV1-46  |
| IRF4       | 7.7E-256 | 1.1E+00 | 5.4E-01 | 4.7E-02 | 1.2E-251 | Plasmablast | IRF4      |
| IGHA2.1    | 6.1E-255 | 2.5E+00 | 2.3E-01 | 9.0E-03 | 9.5E-251 | Plasmablast | IGHA2     |
| IGKV1-27   | 2.9E-253 | 5.1E+00 | 1.0E-01 | 2.0E-03 | 4.5E-249 | Plasmablast | IGKV1-27  |
| IGHV3-23   | 7.2E-248 | 6.1E+00 | 1.5E-01 | 4.0E-03 | 1.1E-243 | Plasmablast | IGHV3-23  |
| IGHV4-59   | 3.0E-241 | 4.4E+00 | 1.3E-01 | 2.0E-03 | 4.7E-237 | Plasmablast | IGHV4-59  |
| IGHV4-34   | 1.3E-231 | 5.9E+00 | 1.5E-01 | 4.0E-03 | 2.1E-227 | Plasmablast | IGHV4-34  |
| IGHV3-21   | 1.5E-218 | 5.4E+00 | 1.1E-01 | 2.0E-03 | 2.3E-214 | Plasmablast | IGHV3-21  |
| IGHV3-30   | 1.6E-218 | 6.0E+00 | 1.5E-01 | 4.0E-03 | 2.4E-214 | Plasmablast | IGHV3-30  |
| IGKV1-39.1 | 2.2E-206 | 7.2E+00 | 1.8E-01 | 7.0E-03 | 3.5E-202 | Plasmablast | IGKV1-39  |
| IGHV3-48   | 2.5E-196 | 6.0E+00 | 1.0E-01 | 2.0E-03 | 3.9E-192 | Plasmablast | IGHV3-48  |
| IGHV1-2    | 2.9E-181 | 6.9E+00 | 1.7E-01 | 6.0E-03 | 4.4E-177 | Plasmablast | IGHV1-2   |
| IGLV3-21.1 | 1.4E-176 | 6.2E+00 | 1.7E-01 | 7.0E-03 | 2.1E-172 | Plasmablast | IGLV3-21  |
| IGHV3-11   | 3.0E-174 | 6.0E+00 | 1.1E-01 | 3.0E-03 | 4.6E-170 | Plasmablast | IGHV3-11  |
| PRDX4      | 2.2E-168 | 1.7E+00 | 8.0E-01 | 1.7E-01 | 3.4E-164 | Plasmablast | PRDX4     |
| IGHV3-33   | 4.7E-162 | 4.8E+00 | 1.1E-01 | 3.0E-03 | 7.4E-158 | Plasmablast | IGHV3-33  |
| TENT5C.1   | 5.8E-157 | 1.4E+00 | 7.4E-01 | 1.3E-01 | 9.0E-153 | Plasmablast | TENT5C    |
| IGKV3-11   | 9.9E-149 | 6.5E+00 | 1.5E-01 | 6.0E-03 | 1.5E-144 | Plasmablast | IGKV3-11  |
| IGLV2-23   | 4.0E-139 | 6.6E+00 | 1.3E-01 | 5.0E-03 | 6.2E-135 | Plasmablast | IGLV2-23  |
| IGKV1D-33  | 1.8E-137 | 5.0E+00 | 1.1E-01 | 4.0E-03 | 2.8E-133 | Plasmablast | IGKV1D-33 |
| RRBP1.1    | 7.0E-136 | 1.1E+00 | 6.8E-01 | 1.3E-01 | 1.1E-131 | Plasmablast | RRBP1     |
| UBE2J1.1   | 2.3E-134 | 1.8E+00 | 8.0E-01 | 2.3E-01 | 3.7E-130 | Plasmablast | UBE2J1    |
| ATF5.1     | 4.2E-129 | 1.7E+00 | 6.2E-01 | 1.2E-01 | 6.6E-125 | Plasmablast | ATF5      |
| IGLV1-47   | 7.3E-124 | 5.8E+00 | 1.0E-01 | 4.0E-03 | 1.1E-119 | Plasmablast | IGLV1-47  |
| PDIA4.1    | 8.1E-123 | 1.6E+00 | 8.1E-01 | 2.3E-01 | 1.3E-118 | Plasmablast | PDIA4     |
| HSP90B1.1  | 2.9E-115 | 2.4E+00 | 9.7E-01 | 6.4E-01 | 4.5E-111 | Plasmablast | HSP90B1   |
| SEC11C     | 2.0E-109 | 1.8E+00 | 9.0E-01 | 4.4E-01 | 3.1E-105 | Plasmablast | SEC11C    |
| IGLV1-40   | 1.8E-102 | 6.2E+00 | 1.1E-01 | 5.0E-03 | 2.7E-98  | Plasmablast | IGLV1-40  |
| XBP1.1     | 2.3E-98  | 2.0E+00 | 9.6E-01 | 5.1E-01 | 3.6E-94  | Plasmablast | XBP1      |
| SSR4.1     | 6.3E-96  | 1.5E+00 | 9.8E-01 | 8.4E-01 | 9.9E-92  | Plasmablast | SSR4      |
| MYDGF      | 1.1E-93  | 1.7E+00 | 8.4E-01 | 3.4E-01 | 1.6E-89  | Plasmablast | MYDGF     |
| IGHV4-39.1 | 8.8E-91  | 5.2E+00 | 1.3E-01 | 8.0E-03 | 1.4E-86  | Plasmablast | IGHV4-39  |
| SDF2L1.1   | 1.8E-90  | 1.4E+00 | 8.0E-01 | 2.8E-01 | 2.9E-86  | Plasmablast | SDF2L1    |
| SELENOS    | 3.2E-83  | 1.4E+00 | 7.8E-01 | 2.8E-01 | 4.9E-79  | Plasmablast | SELENOS   |

|             |          |         |         |         |          |              |            |
|-------------|----------|---------|---------|---------|----------|--------------|------------|
| SSR3.1      | 4.7E-79  | 1.4E+00 | 8.9E-01 | 4.2E-01 | 7.3E-75  | Plasmablast  | SSR3       |
| FKBP11.1    | 8.4E-78  | 1.4E+00 | 8.6E-01 | 3.5E-01 | 1.3E-73  | Plasmablast  | FKBP11     |
| LMAN1       | 5.0E-73  | 1.1E+00 | 8.0E-01 | 3.0E-01 | 7.7E-69  | Plasmablast  | LMAN1      |
| IGLV2-14.1  | 1.0E-67  | 7.0E+00 | 2.8E-01 | 4.3E-02 | 1.6E-63  | Plasmablast  | IGLV2-14   |
| HERPUD1.1   | 4.3E-66  | 1.5E+00 | 8.7E-01 | 4.7E-01 | 6.7E-62  | Plasmablast  | HERPUD1    |
| MANF.1      | 2.3E-62  | 1.0E+00 | 7.0E-01 | 2.4E-01 | 3.5E-58  | Plasmablast  | MANF       |
| KDELR2      | 5.7E-59  | 1.0E+00 | 7.4E-01 | 3.0E-01 | 8.9E-55  | Plasmablast  | KDELR2     |
| PPIB.1      | 1.2E-53  | 1.3E+00 | 9.7E-01 | 8.8E-01 | 1.9E-49  | Plasmablast  | PPIB       |
| HSPA5.1     | 5.6E-49  | 1.3E+00 | 8.6E-01 | 4.8E-01 | 8.8E-45  | Plasmablast  | HSPA5      |
| GSTP1.1     | 5.7E-44  | 1.1E+00 | 8.7E-01 | 5.8E-01 | 8.8E-40  | Plasmablast  | GSTP1      |
| IL7R.2      | 0.0E+00  | 1.3E+00 | 8.3E-01 | 4.9E-01 | 0.0E+00  | CD4_T        | IL7R       |
| CD40LG.2    | 0.0E+00  | 1.1E+00 | 4.4E-01 | 1.4E-01 | 0.0E+00  | CD4_T        | CD40LG     |
| CD4.2       | 0.0E+00  | 1.0E+00 | 5.1E-01 | 2.2E-01 | 0.0E+00  | CD4_T        | CD4        |
| CD8A.3      | 0.0E+00  | 3.0E+00 | 8.1E-01 | 7.5E-02 | 0.0E+00  | CD8_T        | CD8A       |
| CD8B.3      | 0.0E+00  | 2.8E+00 | 7.4E-01 | 6.4E-02 | 0.0E+00  | CD8_T        | CD8B       |
| CCL4.3      | 0.0E+00  | 1.9E+00 | 4.9E-01 | 1.5E-01 | 0.0E+00  | CD8_T        | CCL4       |
| CCL5.3      | 0.0E+00  | 1.9E+00 | 9.5E-01 | 5.6E-01 | 0.0E+00  | CD8_T        | CCL5       |
| GZMH.3      | 0.0E+00  | 1.7E+00 | 4.9E-01 | 1.5E-01 | 0.0E+00  | CD8_T        | GZMH       |
| GZMK.3      | 0.0E+00  | 1.6E+00 | 7.2E-01 | 3.3E-01 | 0.0E+00  | CD8_T        | GZMK       |
| NKG7.3      | 0.0E+00  | 1.4E+00 | 7.8E-01 | 2.8E-01 | 0.0E+00  | CD8_T        | NKG7       |
| KLRK1.3     | 0.0E+00  | 1.4E+00 | 5.6E-01 | 1.2E-01 | 0.0E+00  | CD8_T        | KLRK1      |
| CCL4L2.1    | 0.0E+00  | 1.3E+00 | 2.2E-01 | 5.4E-02 | 0.0E+00  | CD8_T        | CCL4L2     |
| LINC02446.1 | 0.0E+00  | 1.2E+00 | 1.8E-01 | 2.2E-02 | 0.0E+00  | CD8_T        | LINC02446  |
| CST7.3      | 0.0E+00  | 1.2E+00 | 8.3E-01 | 5.8E-01 | 0.0E+00  | CD8_T        | CST7       |
| DUSP2.2     | 0.0E+00  | 1.2E+00 | 5.2E-01 | 3.3E-01 | 0.0E+00  | CD8_T        | DUSP2      |
| FOXP3.2     | 0.0E+00  | 3.0E+00 | 7.2E-01 | 3.8E-02 | 0.0E+00  | Regulatory_T | FOXP3      |
| IL2RA.2     | 0.0E+00  | 2.5E+00 | 5.8E-01 | 4.4E-02 | 0.0E+00  | Regulatory_T | IL2RA      |
| RTKN2       | 0.0E+00  | 1.7E+00 | 4.4E-01 | 3.2E-02 | 0.0E+00  | Regulatory_T | RTKN2      |
| TIGIT.4     | 0.0E+00  | 1.7E+00 | 6.5E-01 | 1.7E-01 | 0.0E+00  | Regulatory_T | TIGIT      |
| LINC01943.1 | 0.0E+00  | 1.5E+00 | 4.1E-01 | 1.1E-01 | 0.0E+00  | Regulatory_T | LINC01943  |
| CTLA4.3     | 0.0E+00  | 1.4E+00 | 5.6E-01 | 1.5E-01 | 0.0E+00  | Regulatory_T | CTLA4      |
| AC017002.3  | 0.0E+00  | 1.3E+00 | 3.1E-01 | 3.8E-02 | 0.0E+00  | Regulatory_T | AC017002.3 |
| IL32.4      | 0.0E+00  | 1.2E+00 | 1.0E+00 | 8.9E-01 | 0.0E+00  | Regulatory_T | IL32       |
| IKZF2.1     | 0.0E+00  | 1.2E+00 | 4.0E-01 | 4.2E-02 | 0.0E+00  | Regulatory_T | IKZF2      |
| FCMR.2      | 0.0E+00  | 1.1E+00 | 8.2E-01 | 4.3E-01 | 0.0E+00  | Regulatory_T | FCMR       |
| LTB.3       | 0.0E+00  | 1.1E+00 | 9.8E-01 | 7.9E-01 | 0.0E+00  | Regulatory_T | LTB        |
| LAIR2       | 0.0E+00  | 1.1E+00 | 3.1E-01 | 2.4E-02 | 0.0E+00  | Regulatory_T | LAIR2      |
| RGS1.1      | 0.0E+00  | 1.1E+00 | 4.8E-01 | 1.7E-01 | 0.0E+00  | Regulatory_T | RGS1       |
| TBC1D4      | 0.0E+00  | 1.1E+00 | 3.9E-01 | 6.7E-02 | 0.0E+00  | Regulatory_T | TBC1D4     |
| UGP2.3      | 0.0E+00  | 1.1E+00 | 6.6E-01 | 3.4E-01 | 0.0E+00  | Regulatory_T | UGP2       |
| SELL.2      | 0.0E+00  | 1.1E+00 | 6.9E-01 | 3.1E-01 | 0.0E+00  | Regulatory_T | SELL       |
| HPGD        | 1.9E-286 | 1.1E+00 | 2.3E-01 | 5.7E-02 | 3.0E-282 | Regulatory_T | HPGD       |
| TNFRSF4.4   | 5.8E-248 | 1.1E+00 | 4.2E-01 | 1.8E-01 | 9.0E-244 | Regulatory_T | TNFRSF4    |
| TNFRSF1B.2  | 1.5E-247 | 1.1E+00 | 5.9E-01 | 3.5E-01 | 2.3E-243 | Regulatory_T | TNFRSF1B   |
| LGALS3.3    | 5.7E-177 | 1.0E+00 | 6.4E-01 | 4.3E-01 | 8.9E-173 | Regulatory_T | LGALS3     |
| TRBV5-1     | 1.1E-45  | 1.2E+00 | 1.2E-01 | 5.7E-02 | 1.8E-41  | Regulatory_T | TRBV5-1    |

|            |          |         |         |         |          |                  |            |
|------------|----------|---------|---------|---------|----------|------------------|------------|
| TRDV1      | 0.0E+00  | 2.4E+00 | 2.4E-01 | 1.4E-02 | 0.0E+00  | Unconventional_T | TRDV1      |
| TRDV2      | 0.0E+00  | 2.0E+00 | 1.7E-01 | 2.0E-03 | 0.0E+00  | Unconventional_T | TRDV2      |
| ZNF683.3   | 0.0E+00  | 1.8E+00 | 3.6E-01 | 7.7E-02 | 0.0E+00  | Unconventional_T | ZNF683     |
| TRGV9      | 0.0E+00  | 1.6E+00 | 2.0E-01 | 3.0E-02 | 0.0E+00  | Unconventional_T | TRGV9      |
| TRDC.1     | 0.0E+00  | 1.4E+00 | 2.8E-01 | 4.8E-02 | 0.0E+00  | Unconventional_T | TRDC       |
| KLRC2      | 9.9E-222 | 1.2E+00 | 1.9E-01 | 4.2E-02 | 1.5E-217 | Unconventional_T | KLRC2      |
| CD7.3      | 3.5E-183 | 1.1E+00 | 8.4E-01 | 5.5E-01 | 5.4E-179 | Unconventional_T | CD7        |
| JCHAIN.2   | 0.0E+00  | 4.8E+00 | 1.0E+00 | 1.7E-02 | 0.0E+00  | pDC              | JCHAIN     |
| SERPINF1   | 0.0E+00  | 4.1E+00 | 1.0E+00 | 1.7E-02 | 0.0E+00  | pDC              | SERPINF1   |
| LILRA4     | 0.0E+00  | 4.1E+00 | 9.4E-01 | 2.0E-03 | 0.0E+00  | pDC              | LILRA4     |
| IL3RA      | 0.0E+00  | 3.4E+00 | 8.5E-01 | 4.0E-03 | 0.0E+00  | pDC              | IL3RA      |
| TCL1A      | 0.0E+00  | 3.4E+00 | 3.2E-01 | 1.0E-03 | 0.0E+00  | pDC              | TCL1A      |
| PTCRA      | 0.0E+00  | 3.1E+00 | 7.9E-01 | 1.0E-03 | 0.0E+00  | pDC              | PTCRA      |
| KRT5       | 0.0E+00  | 3.0E+00 | 5.6E-01 | 0.0E+00 | 0.0E+00  | pDC              | KRT5       |
| NIBAN3.1   | 0.0E+00  | 2.5E+00 | 7.1E-01 | 5.0E-03 | 0.0E+00  | pDC              | NIBAN3     |
| MAP1A      | 0.0E+00  | 2.5E+00 | 8.8E-01 | 6.0E-03 | 0.0E+00  | pDC              | MAP1A      |
| LAMP5      | 0.0E+00  | 2.5E+00 | 7.7E-01 | 3.0E-03 | 0.0E+00  | pDC              | LAMP5      |
| LRRC26     | 0.0E+00  | 2.4E+00 | 5.6E-01 | 0.0E+00 | 0.0E+00  | pDC              | LRRC26     |
| SCT        | 0.0E+00  | 2.3E+00 | 4.1E-01 | 0.0E+00 | 0.0E+00  | pDC              | SCT        |
| CLEC4C     | 0.0E+00  | 2.2E+00 | 8.2E-01 | 2.0E-03 | 0.0E+00  | pDC              | CLEC4C     |
| DNASE1L3   | 0.0E+00  | 2.2E+00 | 7.9E-01 | 6.0E-03 | 0.0E+00  | pDC              | DNASE1L3   |
| SHD        | 0.0E+00  | 2.1E+00 | 5.6E-01 | 0.0E+00 | 0.0E+00  | pDC              | SHD        |
| SCAMP5.1   | 0.0E+00  | 2.0E+00 | 6.5E-01 | 5.0E-03 | 0.0E+00  | pDC              | SCAMP5     |
| TNFRSF21   | 0.0E+00  | 1.9E+00 | 6.2E-01 | 3.0E-03 | 0.0E+00  | pDC              | TNFRSF21   |
| AC097375.1 | 0.0E+00  | 1.7E+00 | 4.7E-01 | 0.0E+00 | 0.0E+00  | pDC              | AC097375.1 |
| GPM6B      | 0.0E+00  | 1.6E+00 | 4.4E-01 | 3.0E-03 | 0.0E+00  | pDC              | GPM6B      |
| AC007381.1 | 0.0E+00  | 1.5E+00 | 4.7E-01 | 1.0E-03 | 0.0E+00  | pDC              | AC007381.1 |
| PROC       | 0.0E+00  | 1.3E+00 | 5.0E-01 | 1.0E-03 | 0.0E+00  | pDC              | PROC       |
| EPHB1      | 0.0E+00  | 1.3E+00 | 5.9E-01 | 2.0E-03 | 0.0E+00  | pDC              | EPHB1      |
| SMIM5      | 0.0E+00  | 1.3E+00 | 3.5E-01 | 0.0E+00 | 0.0E+00  | pDC              | SMIM5      |
| PTPRS      | 0.0E+00  | 1.3E+00 | 4.7E-01 | 2.0E-03 | 0.0E+00  | pDC              | PTPRS      |
| CCDC183    | 0.0E+00  | 1.2E+00 | 3.8E-01 | 1.0E-03 | 0.0E+00  | pDC              | CCDC183    |
| AC023590.1 | 0.0E+00  | 1.1E+00 | 3.5E-01 | 2.0E-03 | 0.0E+00  | pDC              | AC023590.1 |
| PLVAP      | 0.0E+00  | 1.1E+00 | 2.1E-01 | 0.0E+00 | 0.0E+00  | pDC              | PLVAP      |
| PLXNA4     | 0.0E+00  | 1.0E+00 | 3.8E-01 | 2.0E-03 | 0.0E+00  | pDC              | PLXNA4     |
| TSPAN13.1  | 1.7E-294 | 3.1E+00 | 8.2E-01 | 1.6E-02 | 2.6E-290 | pDC              | TSPAN13    |
| MYBL2.1    | 6.1E-292 | 2.0E+00 | 6.2E-01 | 9.0E-03 | 9.6E-288 | pDC              | MYBL2      |
| BCL11A.1   | 1.2E-282 | 2.9E+00 | 8.8E-01 | 2.0E-02 | 1.9E-278 | pDC              | BCL11A     |
| NRP1       | 3.8E-275 | 1.1E+00 | 4.4E-01 | 5.0E-03 | 5.9E-271 | pDC              | NRP1       |
| DERL3.1    | 2.2E-274 | 2.7E+00 | 7.4E-01 | 1.4E-02 | 3.4E-270 | pDC              | DERL3      |
| PTGDS      | 4.5E-243 | 6.2E+00 | 5.0E-01 | 7.0E-03 | 7.1E-239 | pDC              | PTGDS      |
| ST14       | 6.8E-241 | 1.4E+00 | 5.3E-01 | 8.0E-03 | 1.1E-236 | pDC              | ST14       |
| TPM2       | 2.3E-215 | 1.9E+00 | 5.3E-01 | 9.0E-03 | 3.6E-211 | pDC              | TPM2       |
| SMPD3      | 8.1E-205 | 2.8E+00 | 8.2E-01 | 2.4E-02 | 1.3E-200 | pDC              | SMPD3      |
| SPIB.1     | 1.8E-201 | 3.3E+00 | 9.1E-01 | 3.0E-02 | 2.8E-197 | pDC              | SPIB       |
| ZFAT.1     | 9.6E-201 | 2.7E+00 | 7.9E-01 | 2.3E-02 | 1.5E-196 | pDC              | ZFAT       |

|             |          |         |         |         |          |     |           |
|-------------|----------|---------|---------|---------|----------|-----|-----------|
| IGKC.2      | 1.4E-185 | 2.5E+00 | 8.5E-01 | 2.8E-02 | 2.2E-181 | pDC | IGKC      |
| PLD4.1      | 1.1E-184 | 3.8E+00 | 8.8E-01 | 3.1E-02 | 1.7E-180 | pDC | PLD4      |
| TCF4.2      | 1.5E-176 | 3.8E+00 | 1.0E+00 | 4.3E-02 | 2.4E-172 | pDC | TCF4      |
| TIFAB       | 4.0E-172 | 1.3E+00 | 4.1E-01 | 7.0E-03 | 6.2E-168 | pDC | TIFAB     |
| CMKLR1      | 7.5E-169 | 1.4E+00 | 4.4E-01 | 8.0E-03 | 1.2E-164 | pDC | CMKLR1    |
| PHACTR1.1   | 8.2E-157 | 1.7E+00 | 6.2E-01 | 1.7E-02 | 1.3E-152 | pDC | PHACTR1   |
| RASD1       | 9.8E-155 | 1.6E+00 | 3.8E-01 | 7.0E-03 | 1.5E-150 | pDC | RASD1     |
| VIPR2       | 1.5E-150 | 1.6E+00 | 2.9E-01 | 4.0E-03 | 2.3E-146 | pDC | VIPR2     |
| SERPINF2    | 8.7E-149 | 1.6E+00 | 5.0E-01 | 1.2E-02 | 1.4E-144 | pDC | SERPINF2  |
| IRF8.1      | 1.2E-141 | 4.4E+00 | 1.0E+00 | 5.5E-02 | 1.8E-137 | pDC | IRF8      |
| LILRB4      | 1.3E-135 | 2.5E+00 | 8.2E-01 | 3.6E-02 | 2.0E-131 | pDC | LILRB4    |
| PFKFB2      | 2.2E-134 | 1.4E+00 | 3.8E-01 | 8.0E-03 | 3.4E-130 | pDC | PFKFB2    |
| APP         | 9.3E-130 | 3.1E+00 | 9.7E-01 | 5.6E-02 | 1.4E-125 | pDC | APP       |
| GAS6.1      | 7.4E-127 | 2.5E+00 | 7.1E-01 | 2.9E-02 | 1.2E-122 | pDC | GAS6      |
| BLNK.2      | 6.3E-125 | 2.2E+00 | 7.1E-01 | 2.9E-02 | 9.8E-121 | pDC | BLNK      |
| DAB2        | 8.7E-124 | 1.3E+00 | 4.4E-01 | 1.1E-02 | 1.4E-119 | pDC | DAB2      |
| LINC00996   | 5.4E-123 | 2.1E+00 | 5.3E-01 | 1.6E-02 | 8.4E-119 | pDC | LINC00996 |
| TUBB6       | 8.3E-118 | 1.5E+00 | 5.3E-01 | 1.7E-02 | 1.3E-113 | pDC | TUBB6     |
| MZB1.1      | 5.9E-115 | 2.9E+00 | 8.8E-01 | 5.0E-02 | 9.2E-111 | pDC | MZB1      |
| MPEG1.1     | 1.1E-110 | 3.0E+00 | 8.8E-01 | 5.2E-02 | 1.6E-106 | pDC | MPEG1     |
| LGMN.1      | 1.6E-109 | 1.5E+00 | 5.3E-01 | 1.8E-02 | 2.4E-105 | pDC | LGMN      |
| GAPT.1      | 8.9E-108 | 1.9E+00 | 7.4E-01 | 3.6E-02 | 1.4E-103 | pDC | GAPT      |
| CD36        | 7.1E-107 | 1.2E+00 | 4.7E-01 | 1.5E-02 | 1.1E-102 | pDC | CD36      |
| RUBCNL.1    | 3.0E-106 | 1.9E+00 | 5.6E-01 | 2.1E-02 | 4.7E-102 | pDC | RUBCNL    |
| COBLL1.2    | 1.8E-104 | 1.5E+00 | 5.0E-01 | 1.7E-02 | 2.8E-100 | pDC | COBLL1    |
| LINC02812.1 | 5.6E-104 | 1.3E+00 | 4.7E-01 | 1.5E-02 | 8.8E-100 | pDC | LINC02812 |
| TNFSF13     | 3.7E-102 | 1.8E+00 | 7.9E-01 | 4.3E-02 | 5.7E-98  | pDC | TNFSF13   |
| AFF3.1      | 1.5E-97  | 1.6E+00 | 6.8E-01 | 3.3E-02 | 2.3E-93  | pDC | AFF3      |
| TMEM8B      | 2.1E-97  | 1.4E+00 | 4.7E-01 | 1.6E-02 | 3.4E-93  | pDC | TMEM8B    |
| TLR9.1      | 2.0E-93  | 2.0E+00 | 5.9E-01 | 2.7E-02 | 3.1E-89  | pDC | TLR9      |
| CBFA2T3.1   | 2.0E-89  | 1.4E+00 | 5.3E-01 | 2.2E-02 | 3.2E-85  | pDC | CBFA2T3   |
| BSPRY       | 5.6E-87  | 1.0E+00 | 2.4E-01 | 4.0E-03 | 8.7E-83  | pDC | BSPRY     |
| CYBB.2      | 1.1E-85  | 2.3E+00 | 8.5E-01 | 5.9E-02 | 1.8E-81  | pDC | CYBB      |
| CCDC189     | 2.1E-84  | 1.0E+00 | 3.5E-01 | 1.0E-02 | 3.3E-80  | pDC | CCDC189   |
| P2RY14      | 4.7E-80  | 1.7E+00 | 6.2E-01 | 3.4E-02 | 7.4E-76  | pDC | P2RY14    |
| CLN8.1      | 1.3E-77  | 1.9E+00 | 7.1E-01 | 4.6E-02 | 2.0E-73  | pDC | CLN8      |
| TRAF4.1     | 7.3E-75  | 2.3E+00 | 6.5E-01 | 4.0E-02 | 1.1E-70  | pDC | TRAF4     |
| TLR7.1      | 1.4E-74  | 1.2E+00 | 4.1E-01 | 1.6E-02 | 2.1E-70  | pDC | TLR7      |
| MYCL        | 1.9E-74  | 1.4E+00 | 3.8E-01 | 1.4E-02 | 2.9E-70  | pDC | MYCL      |
| CXXC5.2     | 1.7E-71  | 1.7E+00 | 7.1E-01 | 4.9E-02 | 2.7E-67  | pDC | CXXC5     |
| GZMB.4      | 6.5E-71  | 4.8E+00 | 1.0E+00 | 1.2E-01 | 1.0E-66  | pDC | GZMB      |
| CSF2RB.1    | 7.9E-70  | 1.6E+00 | 5.6E-01 | 3.2E-02 | 1.2E-65  | pDC | CSF2RB    |
| CCDC50.3    | 9.7E-70  | 3.0E+00 | 1.0E+00 | 1.2E-01 | 1.5E-65  | pDC | CCDC50    |
| CD68.2      | 9.4E-68  | 2.6E+00 | 8.5E-01 | 7.8E-02 | 1.5E-63  | pDC | CD68      |
| TGFBI       | 2.0E-67  | 2.0E+00 | 7.1E-01 | 5.3E-02 | 3.2E-63  | pDC | TGFBI     |
| PRXL2A      | 6.5E-67  | 1.7E+00 | 4.1E-01 | 1.8E-02 | 1.0E-62  | pDC | PRXL2A    |

|            |         |         |         |         |         |     |          |
|------------|---------|---------|---------|---------|---------|-----|----------|
| MS4A6A     | 7.9E-67 | 2.3E+00 | 7.7E-01 | 6.0E-02 | 1.2E-62 | pDC | MS4A6A   |
| MEF2C.3    | 4.6E-66 | 2.0E+00 | 8.2E-01 | 7.1E-02 | 7.2E-62 | pDC | MEF2C    |
| RNASE6.4   | 3.6E-64 | 2.5E+00 | 8.2E-01 | 7.9E-02 | 5.7E-60 | pDC | RNASE6   |
| PACSIN1    | 4.9E-63 | 1.2E+00 | 3.2E-01 | 1.2E-02 | 7.6E-59 | pDC | PACSIN1  |
| CCDC88A.1  | 4.9E-61 | 2.2E+00 | 7.7E-01 | 7.0E-02 | 7.6E-57 | pDC | CCDC88A  |
| GNG7.2     | 3.4E-60 | 1.2E+00 | 4.1E-01 | 2.0E-02 | 5.4E-56 | pDC | GNG7     |
| CYB561A3.1 | 4.6E-60 | 3.1E+00 | 9.7E-01 | 1.3E-01 | 7.1E-56 | pDC | CYB561A3 |
| NEK8       | 8.6E-58 | 1.1E+00 | 3.8E-01 | 1.8E-02 | 1.3E-53 | pDC | NEK8     |
| SUSD1      | 1.5E-57 | 1.7E+00 | 4.4E-01 | 2.4E-02 | 2.4E-53 | pDC | SUSD1    |
| CHAF1A     | 5.3E-56 | 1.5E+00 | 5.9E-01 | 4.3E-02 | 8.3E-52 | pDC | CHAF1A   |
| TEX2       | 1.0E-55 | 1.1E+00 | 4.1E-01 | 2.1E-02 | 1.6E-51 | pDC | TEX2     |
| PLAC8.3    | 9.6E-54 | 3.4E+00 | 9.4E-01 | 1.4E-01 | 1.5E-49 | pDC | PLAC8    |
| UGCG.1     | 1.8E-52 | 2.7E+00 | 9.4E-01 | 1.4E-01 | 2.9E-48 | pDC | UGCG     |
| IGHM.2     | 4.3E-52 | 1.4E+00 | 3.5E-01 | 1.7E-02 | 6.7E-48 | pDC | IGHM     |
| PPP1R14B.2 | 8.3E-52 | 2.8E+00 | 8.8E-01 | 1.1E-01 | 1.3E-47 | pDC | PPP1R14B |
| P2RY6      | 3.8E-51 | 1.1E+00 | 4.4E-01 | 2.7E-02 | 6.0E-47 | pDC | P2RY6    |
| CST3.2     | 6.9E-51 | 2.1E+00 | 8.2E-01 | 8.9E-02 | 1.1E-46 | pDC | CST3     |
| TXNDC5.1   | 2.4E-50 | 1.6E+00 | 5.3E-01 | 3.9E-02 | 3.7E-46 | pDC | TXNDC5   |
| WDFY4.1    | 1.4E-47 | 1.3E+00 | 4.7E-01 | 3.2E-02 | 2.2E-43 | pDC | WDFY4    |
| FCER1G.6   | 1.0E-46 | 2.3E+00 | 8.8E-01 | 1.1E-01 | 1.6E-42 | pDC | FCER1G   |
| TYROBP.4   | 4.1E-45 | 2.3E+00 | 9.4E-01 | 1.3E-01 | 6.3E-41 | pDC | TYROBP   |
| SULF2      | 4.1E-45 | 1.5E+00 | 5.0E-01 | 3.9E-02 | 6.4E-41 | pDC | SULF2    |
| ALDH2      | 9.1E-45 | 1.3E+00 | 5.3E-01 | 4.3E-02 | 1.4E-40 | pDC | ALDH2    |
| SETBP1.1   | 4.1E-42 | 1.1E+00 | 3.5E-01 | 2.1E-02 | 6.4E-38 | pDC | SETBP1   |
| IDH3A      | 5.2E-39 | 2.0E+00 | 7.9E-01 | 1.1E-01 | 8.2E-35 | pDC | IDH3A    |
| RNF130.1   | 3.4E-38 | 2.0E+00 | 6.8E-01 | 8.4E-02 | 5.2E-34 | pDC | RNF130   |
| PLEK.5     | 6.8E-38 | 2.7E+00 | 8.8E-01 | 1.7E-01 | 1.1E-33 | pDC | PLEK     |
| ARID3A.2   | 1.5E-37 | 1.1E+00 | 5.0E-01 | 4.5E-02 | 2.3E-33 | pDC | ARID3A   |
| FLNB       | 5.2E-36 | 1.2E+00 | 4.7E-01 | 4.2E-02 | 8.1E-32 | pDC | FLNB     |
| SLC15A4    | 9.4E-35 | 1.6E+00 | 5.0E-01 | 4.9E-02 | 1.5E-30 | pDC | SLC15A4  |
| MAPKAPK2   | 1.8E-34 | 2.4E+00 | 8.8E-01 | 1.7E-01 | 2.8E-30 | pDC | MAPKAPK2 |
| IRF4.1     | 3.0E-34 | 1.8E+00 | 5.0E-01 | 5.0E-02 | 4.7E-30 | pDC | IRF4     |
| SCARB2     | 3.5E-34 | 1.3E+00 | 5.6E-01 | 6.1E-02 | 5.5E-30 | pDC | SCARB2   |
| IRF7       | 5.1E-34 | 4.3E+00 | 1.0E+00 | 3.1E-01 | 7.9E-30 | pDC | IRF7     |
| OPN3.1     | 6.6E-34 | 1.0E+00 | 4.1E-01 | 3.4E-02 | 1.0E-29 | pDC | OPN3     |
| GRN.5      | 1.9E-33 | 2.5E+00 | 9.1E-01 | 2.0E-01 | 3.0E-29 | pDC | GRN      |
| NPC2.3     | 4.0E-33 | 3.4E+00 | 1.0E+00 | 3.1E-01 | 6.2E-29 | pDC | NPC2     |
| CLIC3.5    | 4.5E-33 | 2.7E+00 | 8.2E-01 | 1.5E-01 | 7.1E-29 | pDC | CLIC3    |
| FCHSD2.1   | 5.1E-33 | 1.4E+00 | 6.5E-01 | 8.6E-02 | 7.9E-29 | pDC | FCHSD2   |
| STMN1.2    | 9.0E-33 | 1.8E+00 | 8.2E-01 | 1.4E-01 | 1.4E-28 | pDC | STMN1    |
| SLC7A5     | 6.8E-32 | 1.6E+00 | 6.8E-01 | 9.5E-02 | 1.1E-27 | pDC | SLC7A5   |
| ADGRL1     | 1.3E-31 | 1.1E+00 | 2.7E-01 | 1.6E-02 | 2.0E-27 | pDC | ADGRL1   |
| CORO1C.1   | 2.6E-31 | 1.1E+00 | 4.7E-01 | 4.9E-02 | 4.0E-27 | pDC | CORO1C   |
| LILRB1.1   | 6.5E-30 | 1.1E+00 | 4.7E-01 | 4.9E-02 | 1.0E-25 | pDC | LILRB1   |
| ITM2C.5    | 2.6E-28 | 2.7E+00 | 8.8E-01 | 2.2E-01 | 4.1E-24 | pDC | ITM2C    |
| CUX1       | 3.1E-28 | 1.4E+00 | 7.1E-01 | 1.2E-01 | 4.8E-24 | pDC | CUX1     |

|              |         |         |         |         |         |     |            |
|--------------|---------|---------|---------|---------|---------|-----|------------|
| GSN.3        | 5.7E-28 | 1.2E+00 | 5.9E-01 | 7.9E-02 | 8.8E-24 | pDC | GSN        |
| SYK.3        | 1.3E-27 | 1.4E+00 | 5.6E-01 | 7.4E-02 | 2.1E-23 | pDC | SYK        |
| LYN.3        | 8.6E-27 | 1.8E+00 | 5.9E-01 | 8.9E-02 | 1.3E-22 | pDC | LYN        |
| NBPF14       | 3.0E-26 | 1.6E+00 | 5.6E-01 | 7.9E-02 | 4.7E-22 | pDC | NBPF14     |
| ST6GALNAC4.2 | 4.6E-26 | 1.4E+00 | 5.0E-01 | 6.5E-02 | 7.2E-22 | pDC | ST6GALNAC4 |
| AHI1         | 5.9E-25 | 1.0E+00 | 4.4E-01 | 5.1E-02 | 9.2E-21 | pDC | AHI1       |
| PLXNB2       | 8.2E-25 | 1.2E+00 | 3.2E-01 | 3.0E-02 | 1.3E-20 | pDC | PLXNB2     |
| FAM43A.1     | 1.0E-24 | 1.1E+00 | 3.5E-01 | 3.4E-02 | 1.6E-20 | pDC | FAM43A     |
| DUSP5        | 2.7E-24 | 1.7E+00 | 5.3E-01 | 7.6E-02 | 4.1E-20 | pDC | DUSP5      |
| SOX4.1       | 3.1E-24 | 1.4E+00 | 3.8E-01 | 4.1E-02 | 4.8E-20 | pDC | SOX4       |
| FCGRT.3      | 4.3E-24 | 1.6E+00 | 6.2E-01 | 1.1E-01 | 6.7E-20 | pDC | FCGRT      |
| RUBCN        | 9.3E-24 | 1.2E+00 | 5.6E-01 | 8.4E-02 | 1.5E-19 | pDC | RUBCN      |
| TSPAN3.2     | 1.3E-23 | 1.2E+00 | 5.3E-01 | 7.7E-02 | 2.0E-19 | pDC | TSPAN3     |
| ZDHHC17      | 1.3E-23 | 1.4E+00 | 4.7E-01 | 6.2E-02 | 2.1E-19 | pDC | ZDHHC17    |
| CIITA.2      | 1.7E-23 | 1.3E+00 | 5.0E-01 | 7.1E-02 | 2.6E-19 | pDC | CIITA      |
| HLA-DMB.4    | 1.7E-23 | 1.4E+00 | 7.9E-01 | 1.7E-01 | 2.6E-19 | pDC | HLA-DMB    |
| SEL1L3.2     | 4.0E-23 | 1.8E+00 | 7.7E-01 | 1.7E-01 | 6.2E-19 | pDC | SEL1L3     |
| C12orf45     | 4.6E-23 | 1.9E+00 | 5.6E-01 | 9.7E-02 | 7.2E-19 | pDC | C12orf45   |
| CTSZ.3       | 4.9E-22 | 1.6E+00 | 6.5E-01 | 1.3E-01 | 7.7E-18 | pDC | CTSZ       |
| AHCY         | 5.0E-22 | 1.2E+00 | 5.9E-01 | 1.0E-01 | 7.8E-18 | pDC | AHCY       |
| CBX6         | 6.3E-22 | 1.4E+00 | 6.5E-01 | 1.2E-01 | 9.9E-18 | pDC | CBX6       |
| RIPOR1.1     | 6.8E-22 | 1.0E+00 | 4.4E-01 | 5.8E-02 | 1.1E-17 | pDC | RIPOR1     |
| CD2AP        | 2.3E-21 | 1.4E+00 | 6.8E-01 | 1.4E-01 | 3.5E-17 | pDC | CD2AP      |
| CDCA7L.1     | 4.5E-21 | 1.1E+00 | 2.9E-01 | 2.9E-02 | 7.1E-17 | pDC | CDCA7L     |
| VEGFB        | 5.5E-21 | 1.3E+00 | 5.0E-01 | 7.6E-02 | 8.6E-17 | pDC | VEGFB      |
| SEC61B.2     | 5.9E-21 | 2.2E+00 | 1.0E+00 | 7.4E-01 | 9.2E-17 | pDC | SEC61B     |
| HLA-DRA.4    | 7.4E-21 | 1.8E+00 | 1.0E+00 | 4.3E-01 | 1.2E-16 | pDC | HLA-DRA    |
| LAIR1.2      | 1.3E-20 | 1.3E+00 | 7.1E-01 | 1.4E-01 | 2.0E-16 | pDC | LAIR1      |
| SNRNP25.1    | 1.3E-20 | 1.2E+00 | 6.2E-01 | 1.2E-01 | 2.0E-16 | pDC | SNRNP25    |
| DAAM1.1      | 1.4E-20 | 1.3E+00 | 4.1E-01 | 5.4E-02 | 2.2E-16 | pDC | DAAM1      |
| CD74.5       | 3.3E-20 | 2.5E+00 | 1.0E+00 | 9.3E-01 | 5.2E-16 | pDC | CD74       |
| PTPRE.3      | 3.6E-20 | 1.7E+00 | 7.9E-01 | 2.1E-01 | 5.7E-16 | pDC | PTPRE      |
| RRBP1.2      | 4.4E-20 | 1.6E+00 | 6.2E-01 | 1.3E-01 | 6.9E-16 | pDC | RRBP1      |
| CCDC186.1    | 7.4E-20 | 1.6E+00 | 7.4E-01 | 1.8E-01 | 1.1E-15 | pDC | CCDC186    |
| SFT2D2.1     | 1.3E-19 | 1.5E+00 | 7.4E-01 | 1.8E-01 | 2.0E-15 | pDC | SFT2D2     |
| CAT.1        | 1.6E-19 | 1.6E+00 | 7.9E-01 | 2.2E-01 | 2.5E-15 | pDC | CAT        |
| KCTD5.1      | 3.4E-19 | 1.0E+00 | 4.7E-01 | 7.4E-02 | 5.3E-15 | pDC | KCTD5      |
| ERCC1.1      | 3.5E-19 | 1.5E+00 | 7.9E-01 | 2.2E-01 | 5.5E-15 | pDC | ERCC1      |
| LINC02245.1  | 1.1E-18 | 1.1E+00 | 4.1E-01 | 6.0E-02 | 1.7E-14 | pDC | LINC02245  |
| MOB1B        | 1.4E-18 | 1.0E+00 | 3.5E-01 | 4.4E-02 | 2.2E-14 | pDC | MOB1B      |
| SPCS1.1      | 2.0E-18 | 1.7E+00 | 1.0E+00 | 7.0E-01 | 3.1E-14 | pDC | SPCS1      |
| SKAP2.2      | 2.0E-18 | 1.3E+00 | 5.6E-01 | 1.1E-01 | 3.2E-14 | pDC | SKAP2      |
| HIGD1A.1     | 4.9E-18 | 1.9E+00 | 8.2E-01 | 3.1E-01 | 7.6E-14 | pDC | HIGD1A     |
| SLAMF7.5     | 5.0E-18 | 1.6E+00 | 5.9E-01 | 1.2E-01 | 7.8E-14 | pDC | SLAMF7     |
| TAX1BP3      | 5.1E-18 | 1.3E+00 | 5.9E-01 | 1.2E-01 | 7.9E-14 | pDC | TAX1BP3    |

|            |         |         |         |         |         |     |          |
|------------|---------|---------|---------|---------|---------|-----|----------|
| ZEB2.5     | 7.8E-18 | 1.0E+00 | 5.9E-01 | 1.1E-01 | 1.2E-13 | pDC | ZEB2     |
| DPYSL2     | 8.8E-18 | 1.0E+00 | 4.7E-01 | 8.0E-02 | 1.4E-13 | pDC | DPYSL2   |
| HLA-DMA.2  | 2.2E-17 | 1.6E+00 | 8.5E-01 | 2.8E-01 | 3.5E-13 | pDC | HLA-DMA  |
| HLA-DPA1.6 | 3.7E-17 | 1.5E+00 | 1.0E+00 | 6.4E-01 | 5.8E-13 | pDC | HLA-DPA1 |
| SMIM14.4   | 7.1E-17 | 1.1E+00 | 5.3E-01 | 1.0E-01 | 1.1E-12 | pDC | SMIM14   |
| RUNX2.1    | 7.2E-17 | 1.2E+00 | 6.5E-01 | 1.5E-01 | 1.1E-12 | pDC | RUNX2    |
| CTSB.3     | 8.4E-17 | 1.8E+00 | 9.4E-01 | 4.0E-01 | 1.3E-12 | pDC | CTSB     |
| HERPUD1.5  | 1.4E-16 | 2.2E+00 | 9.1E-01 | 4.7E-01 | 2.1E-12 | pDC | HERPUD1  |
| VAMP8.4    | 1.7E-16 | 1.5E+00 | 1.0E+00 | 6.6E-01 | 2.7E-12 | pDC | VAMP8    |
| PPM1K.2    | 2.8E-16 | 1.2E+00 | 8.2E-01 | 2.5E-01 | 4.3E-12 | pDC | PPM1K    |
| PGD        | 3.2E-16 | 1.3E+00 | 6.8E-01 | 1.7E-01 | 5.0E-12 | pDC | PGD      |
| PARVB.2    | 3.9E-16 | 1.0E+00 | 5.0E-01 | 9.8E-02 | 6.1E-12 | pDC | PARVB    |
| MAN2B1.1   | 4.2E-16 | 1.4E+00 | 8.2E-01 | 2.7E-01 | 6.5E-12 | pDC | MAN2B1   |
| ATP13A2    | 5.3E-16 | 1.0E+00 | 3.8E-01 | 6.0E-02 | 8.3E-12 | pDC | ATP13A2  |
| PSAP.3     | 6.7E-16 | 1.9E+00 | 9.7E-01 | 5.1E-01 | 1.0E-11 | pDC | PSAP     |
| PARK7.3    | 1.7E-15 | 1.6E+00 | 9.7E-01 | 7.1E-01 | 2.6E-11 | pDC | PARK7    |
| IGFLR1.2   | 1.7E-15 | 1.6E+00 | 8.8E-01 | 4.2E-01 | 2.6E-11 | pDC | IGFLR1   |
| C12orf75.4 | 1.8E-15 | 1.8E+00 | 8.5E-01 | 3.3E-01 | 2.9E-11 | pDC | C12orf75 |
| STK11IP    | 2.9E-15 | 1.0E+00 | 2.9E-01 | 3.8E-02 | 4.6E-11 | pDC | STK11IP  |
| ATG101     | 3.7E-15 | 1.1E+00 | 5.6E-01 | 1.3E-01 | 5.8E-11 | pDC | ATG101   |
| NAGK.1     | 9.4E-15 | 1.3E+00 | 6.5E-01 | 1.6E-01 | 1.5E-10 | pDC | NAGK     |
| PLP2.1     | 9.9E-15 | 1.4E+00 | 9.7E-01 | 6.2E-01 | 1.5E-10 | pDC | PLP2     |
| CTSC.3     | 1.0E-14 | 1.4E+00 | 9.7E-01 | 6.0E-01 | 1.6E-10 | pDC | CTSC     |
| B4GALT1.2  | 1.6E-14 | 1.3E+00 | 6.5E-01 | 1.7E-01 | 2.6E-10 | pDC | B4GALT1  |
| CYTH4      | 3.0E-14 | 1.4E+00 | 7.4E-01 | 2.4E-01 | 4.7E-10 | pDC | CYTH4    |
| IGF2R.1    | 3.3E-14 | 1.0E+00 | 5.9E-01 | 1.4E-01 | 5.1E-10 | pDC | IGF2R    |
| SELL.4     | 3.9E-14 | 1.2E+00 | 9.1E-01 | 3.4E-01 | 6.1E-10 | pDC | SELL     |
| HLA-DPB1.5 | 4.0E-14 | 1.0E+00 | 9.7E-01 | 6.3E-01 | 6.3E-10 | pDC | HLA-DPB1 |
| STX7.2     | 7.6E-14 | 1.3E+00 | 5.3E-01 | 1.3E-01 | 1.2E-09 | pDC | STX7     |
| ADGRG5.1   | 8.3E-14 | 1.0E+00 | 3.2E-01 | 4.9E-02 | 1.3E-09 | pDC | ADGRG5   |
| HLA-DRB1.5 | 8.4E-14 | 1.3E+00 | 9.4E-01 | 5.9E-01 | 1.3E-09 | pDC | HLA-DRB1 |
| CHPF.1     | 1.5E-13 | 1.0E+00 | 3.5E-01 | 5.9E-02 | 2.3E-09 | pDC | CHPF     |
| ETV6.3     | 1.6E-13 | 1.3E+00 | 5.9E-01 | 1.5E-01 | 2.5E-09 | pDC | ETV6     |
| RASSF2.1   | 2.0E-13 | 1.2E+00 | 5.9E-01 | 1.6E-01 | 3.1E-09 | pDC | RASSF2   |
| HSP90B1.2  | 2.0E-13 | 1.4E+00 | 9.4E-01 | 6.4E-01 | 3.2E-09 | pDC | HSP90B1  |
| CD4.6      | 2.7E-13 | 1.8E+00 | 8.5E-01 | 3.5E-01 | 4.2E-09 | pDC | CD4      |
| NBPF26.2   | 2.8E-13 | 1.4E+00 | 7.9E-01 | 2.8E-01 | 4.4E-09 | pDC | NBPF26   |
| MX1.2      | 4.1E-13 | 1.2E+00 | 7.7E-01 | 2.6E-01 | 6.4E-09 | pDC | MX1      |
| MFSD12     | 5.6E-13 | 1.1E+00 | 3.5E-01 | 6.2E-02 | 8.7E-09 | pDC | MFSD12   |
| PRKCD.1    | 5.8E-13 | 1.1E+00 | 5.0E-01 | 1.1E-01 | 9.0E-09 | pDC | PRKCD    |
| SPINT2.3   | 1.3E-12 | 1.6E+00 | 5.0E-01 | 1.3E-01 | 2.1E-08 | pDC | SPINT2   |
| OSTC.2     | 1.6E-12 | 1.4E+00 | 8.8E-01 | 4.8E-01 | 2.6E-08 | pDC | OSTC     |
| TNFSF13B.4 | 1.8E-12 | 1.1E+00 | 5.6E-01 | 1.4E-01 | 2.7E-08 | pDC | TNFSF13B |
| NADK       | 2.2E-12 | 1.2E+00 | 4.4E-01 | 9.7E-02 | 3.5E-08 | pDC | NADK     |
| TP53I13    | 2.3E-12 | 1.0E+00 | 6.2E-01 | 1.7E-01 | 3.6E-08 | pDC | TP53I13  |
| GABARAP.2  | 2.3E-12 | 1.1E+00 | 1.0E+00 | 8.3E-01 | 3.6E-08 | pDC | GABARAP  |

|           |         |         |         |         |         |            |         |
|-----------|---------|---------|---------|---------|---------|------------|---------|
| ERP29.1   | 2.4E-12 | 1.3E+00 | 9.7E-01 | 6.7E-01 | 3.7E-08 | pDC        | ERP29   |
| THEMIS2.1 | 3.0E-12 | 1.1E+00 | 5.3E-01 | 1.3E-01 | 4.7E-08 | pDC        | THEMIS2 |
| CYBA.2    | 3.7E-12 | 1.2E+00 | 9.1E-01 | 8.8E-01 | 5.8E-08 | pDC        | CYBA    |
| NME4.1    | 5.0E-12 | 1.1E+00 | 4.4E-01 | 9.7E-02 | 7.7E-08 | pDC        | NME4    |
| UBE2J1.2  | 5.2E-12 | 1.5E+00 | 6.8E-01 | 2.3E-01 | 8.1E-08 | pDC        | UBE2J1  |
| HYOU1.1   | 6.8E-12 | 1.2E+00 | 4.7E-01 | 1.1E-01 | 1.1E-07 | pDC        | HYOU1   |
| ALOX5AP.4 | 8.0E-12 | 1.4E+00 | 9.4E-01 | 7.2E-01 | 1.3E-07 | pDC        | ALOX5AP |
| CNPY3.3   | 9.4E-12 | 1.3E+00 | 7.9E-01 | 3.2E-01 | 1.5E-07 | pDC        | CNPY3   |
| PPIB.2    | 2.1E-11 | 1.2E+00 | 9.7E-01 | 8.8E-01 | 3.2E-07 | pDC        | PPIB    |
| CAPG.4    | 2.1E-11 | 1.5E+00 | 8.5E-01 | 3.5E-01 | 3.3E-07 | pDC        | CAPG    |
| MED13L.1  | 2.9E-11 | 1.1E+00 | 4.7E-01 | 1.1E-01 | 4.5E-07 | pDC        | MED13L  |
| PNOC.2    | 3.5E-11 | 1.2E+00 | 1.8E-01 | 2.0E-02 | 5.4E-07 | pDC        | PNOC    |
| OGT       | 3.7E-11 | 1.2E+00 | 8.2E-01 | 3.3E-01 | 5.7E-07 | pDC        | OGT     |
| UNC93B1.1 | 4.4E-11 | 1.1E+00 | 3.8E-01 | 8.4E-02 | 6.9E-07 | pDC        | UNC93B1 |
| MIF4GD    | 5.0E-11 | 1.1E+00 | 7.1E-01 | 2.5E-01 | 7.8E-07 | pDC        | MIF4GD  |
| SELENOS.2 | 9.1E-11 | 1.5E+00 | 6.8E-01 | 2.8E-01 | 1.4E-06 | pDC        | SELENOS |
| CARD11.1  | 1.3E-10 | 1.1E+00 | 5.3E-01 | 1.5E-01 | 2.1E-06 | pDC        | CARD11  |
| GGA2.2    | 1.8E-10 | 1.3E+00 | 5.6E-01 | 1.7E-01 | 2.8E-06 | pDC        | GGA2    |
| PI4KA     | 6.0E-10 | 1.3E+00 | 4.4E-01 | 1.2E-01 | 9.4E-06 | pDC        | PI4KA   |
| SSR3.2    | 9.7E-10 | 1.1E+00 | 8.8E-01 | 4.3E-01 | 1.5E-05 | pDC        | SSR3    |
| FKBP2.3   | 1.6E-09 | 1.2E+00 | 7.1E-01 | 2.7E-01 | 2.6E-05 | pDC        | FKBP2   |
| PLAAT3.3  | 2.6E-09 | 1.2E+00 | 5.0E-01 | 1.6E-01 | 4.0E-05 | pDC        | PLAAT3  |
| DCPS.2    | 3.5E-09 | 1.1E+00 | 5.9E-01 | 1.9E-01 | 5.4E-05 | pDC        | DCPS    |
| TAGLN2.1  | 3.8E-09 | 1.4E+00 | 9.7E-01 | 7.8E-01 | 5.9E-05 | pDC        | TAGLN2  |
| JAML.3    | 4.6E-09 | 1.2E+00 | 7.1E-01 | 3.0E-01 | 7.1E-05 | pDC        | JAML    |
| SLC25A5.1 | 6.0E-09 | 1.1E+00 | 9.4E-01 | 6.7E-01 | 9.4E-05 | pDC        | SLC25A5 |
| NUCB2.3   | 1.1E-08 | 1.1E+00 | 7.1E-01 | 2.9E-01 | 1.7E-04 | pDC        | NUCB2   |
| HMGN3.1   | 1.2E-08 | 1.1E+00 | 7.7E-01 | 4.3E-01 | 1.8E-04 | pDC        | HMGN3   |
| CDKN2D.1  | 1.3E-08 | 1.1E+00 | 5.6E-01 | 1.9E-01 | 2.0E-04 | pDC        | CDKN2D  |
| NOTCH2.1  | 1.5E-08 | 1.1E+00 | 4.4E-01 | 1.3E-01 | 2.3E-04 | pDC        | NOTCH2  |
| TXN.2     | 1.7E-08 | 1.4E+00 | 9.1E-01 | 6.0E-01 | 2.7E-04 | pDC        | TXN     |
| CIAO2A.1  | 1.9E-08 | 1.0E+00 | 7.7E-01 | 3.9E-01 | 2.9E-04 | pDC        | CIAO2A  |
| TMEM109   | 8.0E-08 | 1.1E+00 | 7.4E-01 | 3.8E-01 | 1.2E-03 | pDC        | TMEM109 |
| CD164.1   | 1.0E-07 | 1.0E+00 | 8.8E-01 | 5.0E-01 | 1.6E-03 | pDC        | CD164   |
| GPR183.2  | 1.1E-07 | 1.1E+00 | 6.8E-01 | 2.7E-01 | 1.6E-03 | pDC        | GPR183  |
| PHB       | 1.2E-07 | 1.2E+00 | 6.8E-01 | 3.4E-01 | 1.9E-03 | pDC        | PHB     |
| DCK.2     | 1.9E-07 | 1.0E+00 | 6.2E-01 | 2.8E-01 | 2.9E-03 | pDC        | DCK     |
| NCF1.4    | 2.0E-07 | 1.2E+00 | 7.1E-01 | 3.7E-01 | 3.2E-03 | pDC        | NCF1    |
| DNAJA1    | 7.8E-07 | 1.1E+00 | 7.1E-01 | 3.8E-01 | 1.2E-02 | pDC        | DNAJA1  |
| RNASET2.4 | 8.4E-07 | 1.2E+00 | 7.7E-01 | 5.2E-01 | 1.3E-02 | pDC        | RNASET2 |
| MRPL36    | 1.8E-06 | 1.1E+00 | 5.9E-01 | 2.6E-01 | 2.7E-02 | pDC        | MRPL36  |
| S100A8    | 0.0E+00 | 6.7E+00 | 9.6E-01 | 1.7E-02 | 0.0E+00 | Macrophage | S100A8  |
| S100A9    | 0.0E+00 | 6.4E+00 | 9.7E-01 | 2.8E-02 | 0.0E+00 | Macrophage | S100A9  |
| LYZ.1     | 0.0E+00 | 5.2E+00 | 9.8E-01 | 3.4E-02 | 0.0E+00 | Macrophage | LYZ     |
| VCAN      | 0.0E+00 | 4.7E+00 | 9.2E-01 | 5.0E-03 | 0.0E+00 | Macrophage | VCAN    |
| IFI30.6   | 0.0E+00 | 4.7E+00 | 9.9E-01 | 1.2E-01 | 0.0E+00 | Macrophage | IFI30   |

|            |         |         |         |         |         |            |          |
|------------|---------|---------|---------|---------|---------|------------|----------|
| AIF1.3     | 0.0E+00 | 4.1E+00 | 9.7E-01 | 9.1E-02 | 0.0E+00 | Macrophage | AIF1     |
| FCN1       | 0.0E+00 | 4.0E+00 | 8.9E-01 | 4.0E-03 | 0.0E+00 | Macrophage | FCN1     |
| SERPINA1   | 0.0E+00 | 4.0E+00 | 9.5E-01 | 1.4E-02 | 0.0E+00 | Macrophage | SERPINA1 |
| TYROBP.5   | 0.0E+00 | 4.0E+00 | 9.9E-01 | 9.4E-02 | 0.0E+00 | Macrophage | TYROBP   |
| CD14       | 0.0E+00 | 4.0E+00 | 9.3E-01 | 7.0E-03 | 0.0E+00 | Macrophage | CD14     |
| IFITM3.6   | 0.0E+00 | 3.8E+00 | 9.3E-01 | 1.5E-01 | 0.0E+00 | Macrophage | IFITM3   |
| FCER1G.7   | 0.0E+00 | 3.8E+00 | 9.8E-01 | 7.4E-02 | 0.0E+00 | Macrophage | FCER1G   |
| CST3.3     | 0.0E+00 | 3.3E+00 | 9.8E-01 | 5.7E-02 | 0.0E+00 | Macrophage | CST3     |
| TYMP.5     | 0.0E+00 | 3.1E+00 | 9.5E-01 | 2.6E-01 | 0.0E+00 | Macrophage | TYMP     |
| C1QB       | 0.0E+00 | 3.0E+00 | 2.3E-01 | 1.1E-02 | 0.0E+00 | Macrophage | C1QB     |
| C1QA       | 0.0E+00 | 3.0E+00 | 2.9E-01 | 1.2E-02 | 0.0E+00 | Macrophage | C1QA     |
| TIMP1.4    | 0.0E+00 | 3.0E+00 | 9.4E-01 | 3.8E-01 | 0.0E+00 | Macrophage | TIMP1    |
| NPC2.4     | 0.0E+00 | 3.0E+00 | 9.6E-01 | 2.8E-01 | 0.0E+00 | Macrophage | NPC2     |
| CD68.3     | 0.0E+00 | 2.9E+00 | 9.1E-01 | 4.8E-02 | 0.0E+00 | Macrophage | CD68     |
| MS4A6A.1   | 0.0E+00 | 2.8E+00 | 8.7E-01 | 3.1E-02 | 0.0E+00 | Macrophage | MS4A6A   |
| SPI1.3     | 0.0E+00 | 2.8E+00 | 9.2E-01 | 4.3E-02 | 0.0E+00 | Macrophage | SPI1     |
| CYBB.3     | 0.0E+00 | 2.8E+00 | 8.9E-01 | 2.9E-02 | 0.0E+00 | Macrophage | CYBB     |
| CD163      | 0.0E+00 | 2.8E+00 | 7.6E-01 | 3.0E-03 | 0.0E+00 | Macrophage | CD163    |
| C1QC       | 0.0E+00 | 2.8E+00 | 2.2E-01 | 7.0E-03 | 0.0E+00 | Macrophage | C1QC     |
| HLA-DRA.5  | 0.0E+00 | 2.8E+00 | 9.9E-01 | 4.1E-01 | 0.0E+00 | Macrophage | HLA-DRA  |
| FTL.4      | 0.0E+00 | 2.7E+00 | 1.0E+00 | 9.7E-01 | 0.0E+00 | Macrophage | FTL      |
| CTSB.4     | 0.0E+00 | 2.7E+00 | 9.6E-01 | 3.8E-01 | 0.0E+00 | Macrophage | CTSB     |
| LST1.5     | 0.0E+00 | 2.7E+00 | 9.3E-01 | 1.5E-01 | 0.0E+00 | Macrophage | LST1     |
| PSAP.4     | 0.0E+00 | 2.7E+00 | 9.6E-01 | 5.0E-01 | 0.0E+00 | Macrophage | PSAP     |
| FOS.3      | 0.0E+00 | 2.7E+00 | 9.1E-01 | 1.8E-01 | 0.0E+00 | Macrophage | FOS      |
| MNDA       | 0.0E+00 | 2.6E+00 | 8.6E-01 | 2.6E-02 | 0.0E+00 | Macrophage | MNDA     |
| CCL2       | 0.0E+00 | 2.6E+00 | 4.0E-01 | 3.0E-03 | 0.0E+00 | Macrophage | CCL2     |
| S100A12    | 0.0E+00 | 2.6E+00 | 5.9E-01 | 1.0E-03 | 0.0E+00 | Macrophage | S100A12  |
| FPR1       | 0.0E+00 | 2.6E+00 | 8.5E-01 | 1.1E-02 | 0.0E+00 | Macrophage | FPR1     |
| MAFB       | 0.0E+00 | 2.6E+00 | 7.6E-01 | 3.0E-03 | 0.0E+00 | Macrophage | MAFB     |
| FGL2.2     | 0.0E+00 | 2.5E+00 | 8.8E-01 | 6.2E-02 | 0.0E+00 | Macrophage | FGL2     |
| LILRB2.1   | 0.0E+00 | 2.5E+00 | 8.4E-01 | 8.0E-03 | 0.0E+00 | Macrophage | LILRB2   |
| GRN.6      | 0.0E+00 | 2.4E+00 | 9.0E-01 | 1.8E-01 | 0.0E+00 | Macrophage | GRN      |
| FCGR1A     | 0.0E+00 | 2.4E+00 | 8.3E-01 | 8.0E-03 | 0.0E+00 | Macrophage | FCGR1A   |
| CALHM6.4   | 0.0E+00 | 2.4E+00 | 8.2E-01 | 7.0E-02 | 0.0E+00 | Macrophage | CALHM6   |
| FCGR3A     | 0.0E+00 | 2.4E+00 | 6.8E-01 | 2.3E-02 | 0.0E+00 | Macrophage | FCGR3A   |
| SAT1.5     | 0.0E+00 | 2.4E+00 | 9.7E-01 | 5.8E-01 | 0.0E+00 | Macrophage | SAT1     |
| IFNGR2.2   | 0.0E+00 | 2.3E+00 | 8.3E-01 | 4.2E-02 | 0.0E+00 | Macrophage | IFNGR2   |
| FTH1.5     | 0.0E+00 | 2.3E+00 | 1.0E+00 | 9.2E-01 | 0.0E+00 | Macrophage | FTH1     |
| FCGR2A     | 0.0E+00 | 2.3E+00 | 8.4E-01 | 1.1E-02 | 0.0E+00 | Macrophage | FCGR2A   |
| HLA-DRB1.6 | 0.0E+00 | 2.3E+00 | 9.7E-01 | 5.8E-01 | 0.0E+00 | Macrophage | HLA-DRB1 |
| FBP1       | 0.0E+00 | 2.3E+00 | 7.1E-01 | 2.1E-02 | 0.0E+00 | Macrophage | FBP1     |
| LILRB1.2   | 0.0E+00 | 2.3E+00 | 8.0E-01 | 2.2E-02 | 0.0E+00 | Macrophage | LILRB1   |
| CTSS.4     | 0.0E+00 | 2.3E+00 | 9.5E-01 | 3.5E-01 | 0.0E+00 | Macrophage | CTSS     |
| CLEC7A     | 0.0E+00 | 2.3E+00 | 8.6E-01 | 2.6E-02 | 0.0E+00 | Macrophage | CLEC7A   |
| LILRA5.1   | 0.0E+00 | 2.2E+00 | 7.2E-01 | 6.0E-03 | 0.0E+00 | Macrophage | LILRA5   |

|            |         |         |         |         |         |            |          |
|------------|---------|---------|---------|---------|---------|------------|----------|
| FCGR2B.2   | 0.0E+00 | 2.2E+00 | 6.9E-01 | 3.4E-02 | 0.0E+00 | Macrophage | FCGR2B   |
| FCGRT.4    | 0.0E+00 | 2.2E+00 | 8.6E-01 | 7.7E-02 | 0.0E+00 | Macrophage | FCGRT    |
| ATF5.6     | 0.0E+00 | 2.2E+00 | 7.3E-01 | 9.6E-02 | 0.0E+00 | Macrophage | ATF5     |
| CSF1R.1    | 0.0E+00 | 2.1E+00 | 7.9E-01 | 1.2E-02 | 0.0E+00 | Macrophage | CSF1R    |
| RAB31.3    | 0.0E+00 | 2.1E+00 | 8.3E-01 | 3.8E-02 | 0.0E+00 | Macrophage | RAB31    |
| SLC11A1    | 0.0E+00 | 2.1E+00 | 6.9E-01 | 9.0E-03 | 0.0E+00 | Macrophage | SLC11A1  |
| HCK.2      | 0.0E+00 | 2.1E+00 | 8.5E-01 | 3.1E-02 | 0.0E+00 | Macrophage | HCK      |
| SPP1       | 0.0E+00 | 2.1E+00 | 2.3E-01 | 4.0E-03 | 0.0E+00 | Macrophage | SPP1     |
| APLP2.2    | 0.0E+00 | 2.1E+00 | 8.6E-01 | 9.4E-02 | 0.0E+00 | Macrophage | APLP2    |
| CSF3R      | 0.0E+00 | 2.1E+00 | 7.7E-01 | 1.1E-02 | 0.0E+00 | Macrophage | CSF3R    |
| CFD        | 0.0E+00 | 2.1E+00 | 6.4E-01 | 1.6E-02 | 0.0E+00 | Macrophage | CFD      |
| KCTD12.1   | 0.0E+00 | 2.1E+00 | 8.0E-01 | 2.5E-02 | 0.0E+00 | Macrophage | KCTD12   |
| LAP3.3     | 0.0E+00 | 2.1E+00 | 8.8E-01 | 2.5E-01 | 0.0E+00 | Macrophage | LAP3     |
| TMEM176B   | 0.0E+00 | 2.1E+00 | 5.3E-01 | 7.0E-03 | 0.0E+00 | Macrophage | TMEM176B |
| C15orf48   | 0.0E+00 | 2.1E+00 | 4.4E-01 | 2.1E-02 | 0.0E+00 | Macrophage | C15orf48 |
| TNFSF13B.5 | 0.0E+00 | 2.1E+00 | 8.5E-01 | 1.2E-01 | 0.0E+00 | Macrophage | TNFSF13B |
| ZEB2.6     | 0.0E+00 | 2.1E+00 | 8.4E-01 | 8.6E-02 | 0.0E+00 | Macrophage | ZEB2     |
| NAIP       | 0.0E+00 | 2.0E+00 | 8.0E-01 | 3.7E-02 | 0.0E+00 | Macrophage | NAIP     |
| APOBEC3A   | 0.0E+00 | 2.0E+00 | 4.5E-01 | 1.0E-03 | 0.0E+00 | Macrophage | APOBEC3A |
| WARS.2     | 0.0E+00 | 2.0E+00 | 8.1E-01 | 1.6E-01 | 0.0E+00 | Macrophage | WARS     |
| CXCL10     | 0.0E+00 | 2.0E+00 | 1.9E-01 | 2.0E-03 | 0.0E+00 | Macrophage | CXCL10   |
| TGFBI.1    | 0.0E+00 | 2.0E+00 | 7.5E-01 | 2.8E-02 | 0.0E+00 | Macrophage | TGFBI    |
| C1orf162.6 | 0.0E+00 | 2.0E+00 | 8.7E-01 | 1.5E-01 | 0.0E+00 | Macrophage | C1orf162 |
| RNF130.2   | 0.0E+00 | 2.0E+00 | 8.1E-01 | 5.8E-02 | 0.0E+00 | Macrophage | RNF130   |
| NCF2.1     | 0.0E+00 | 2.0E+00 | 8.1E-01 | 3.1E-02 | 0.0E+00 | Macrophage | NCF2     |
| LRP1       | 0.0E+00 | 2.0E+00 | 7.8E-01 | 7.0E-03 | 0.0E+00 | Macrophage | LRP1     |
| CD74.6     | 0.0E+00 | 1.9E+00 | 1.0E+00 | 9.3E-01 | 0.0E+00 | Macrophage | CD74     |
| CSTA       | 0.0E+00 | 1.9E+00 | 7.8E-01 | 1.0E-02 | 0.0E+00 | Macrophage | CSTA     |
| SOD2.3     | 0.0E+00 | 1.9E+00 | 8.1E-01 | 2.1E-01 | 0.0E+00 | Macrophage | SOD2     |
| IGSF6      | 0.0E+00 | 1.9E+00 | 7.3E-01 | 1.4E-02 | 0.0E+00 | Macrophage | IGSF6    |
| SMIM25     | 0.0E+00 | 1.9E+00 | 6.7E-01 | 3.0E-03 | 0.0E+00 | Macrophage | SMIM25   |
| TNFSF13.1  | 0.0E+00 | 1.9E+00 | 7.5E-01 | 1.8E-02 | 0.0E+00 | Macrophage | TNFSF13  |
| HLA-DPA1.7 | 0.0E+00 | 1.9E+00 | 9.6E-01 | 6.3E-01 | 0.0E+00 | Macrophage | HLA-DPA1 |
| FN1        | 0.0E+00 | 1.9E+00 | 2.0E-01 | 1.0E-03 | 0.0E+00 | Macrophage | FN1      |
| VSIG4      | 0.0E+00 | 1.9E+00 | 5.7E-01 | 7.0E-03 | 0.0E+00 | Macrophage | VSIG4    |
| MPEG1.2    | 0.0E+00 | 1.9E+00 | 7.7E-01 | 2.7E-02 | 0.0E+00 | Macrophage | MPEG1    |
| HLA-DMA.3  | 0.0E+00 | 1.8E+00 | 8.6E-01 | 2.6E-01 | 0.0E+00 | Macrophage | HLA-DMA  |
| HLA-DQA1.5 | 0.0E+00 | 1.8E+00 | 7.9E-01 | 2.5E-01 | 0.0E+00 | Macrophage | HLA-DQA1 |
| MARCH1.3   | 0.0E+00 | 1.8E+00 | 7.9E-01 | 4.0E-02 | 0.0E+00 | Macrophage | MARCH1   |
| HLA-DRB5.3 | 0.0E+00 | 1.8E+00 | 7.4E-01 | 1.9E-01 | 0.0E+00 | Macrophage | HLA-DRB5 |
| THBS1      | 0.0E+00 | 1.8E+00 | 2.8E-01 | 6.0E-03 | 0.0E+00 | Macrophage | THBS1    |
| PILRA      | 0.0E+00 | 1.8E+00 | 7.2E-01 | 9.0E-03 | 0.0E+00 | Macrophage | PILRA    |
| FGR.1      | 0.0E+00 | 1.8E+00 | 7.6E-01 | 6.1E-02 | 0.0E+00 | Macrophage | FGR      |
| HLA-DQB1.4 | 0.0E+00 | 1.8E+00 | 9.1E-01 | 3.3E-01 | 0.0E+00 | Macrophage | HLA-DQB1 |
| GCA.4      | 0.0E+00 | 1.8E+00 | 7.8E-01 | 8.4E-02 | 0.0E+00 | Macrophage | GCA      |
| HLA-DPB1.6 | 0.0E+00 | 1.8E+00 | 9.4E-01 | 6.2E-01 | 0.0E+00 | Macrophage | HLA-DPB1 |

|            |         |         |         |         |         |            |          |
|------------|---------|---------|---------|---------|---------|------------|----------|
| AP1S2.4    | 0.0E+00 | 1.8E+00 | 8.1E-01 | 1.9E-01 | 0.0E+00 | Macrophage | AP1S2    |
| ALOX5.1    | 0.0E+00 | 1.7E+00 | 7.6E-01 | 2.9E-02 | 0.0E+00 | Macrophage | ALOX5    |
| GRINA.5    | 0.0E+00 | 1.7E+00 | 8.6E-01 | 2.0E-01 | 0.0E+00 | Macrophage | GRINA    |
| CLEC10A    | 0.0E+00 | 1.7E+00 | 5.0E-01 | 1.3E-02 | 0.0E+00 | Macrophage | CLEC10A  |
| F13A1      | 0.0E+00 | 1.7E+00 | 5.0E-01 | 6.0E-03 | 0.0E+00 | Macrophage | F13A1    |
| GABARAP.3  | 0.0E+00 | 1.7E+00 | 9.8E-01 | 8.2E-01 | 0.0E+00 | Macrophage | GABARAP  |
| MARCKS.2   | 0.0E+00 | 1.7E+00 | 6.3E-01 | 1.9E-02 | 0.0E+00 | Macrophage | MARCKS   |
| GLUL.3     | 0.0E+00 | 1.7E+00 | 8.6E-01 | 2.6E-01 | 0.0E+00 | Macrophage | GLUL     |
| RNASE1     | 0.0E+00 | 1.7E+00 | 2.1E-01 | 2.0E-03 | 0.0E+00 | Macrophage | RNASE1   |
| S100A11.5  | 0.0E+00 | 1.7E+00 | 9.9E-01 | 8.5E-01 | 0.0E+00 | Macrophage | S100A11  |
| PLXDC2     | 0.0E+00 | 1.7E+00 | 7.0E-01 | 1.3E-02 | 0.0E+00 | Macrophage | PLXDC2   |
| TSPO.4     | 0.0E+00 | 1.7E+00 | 8.8E-01 | 5.4E-01 | 0.0E+00 | Macrophage | TSPO     |
| VAMP5.5    | 0.0E+00 | 1.6E+00 | 8.7E-01 | 4.1E-01 | 0.0E+00 | Macrophage | VAMP5    |
| SERPING1.1 | 0.0E+00 | 1.6E+00 | 5.9E-01 | 7.0E-03 | 0.0E+00 | Macrophage | SERPING1 |
| IER3       | 0.0E+00 | 1.6E+00 | 5.8E-01 | 3.9E-02 | 0.0E+00 | Macrophage | IER3     |
| ZNF385A    | 0.0E+00 | 1.6E+00 | 7.4E-01 | 2.1E-02 | 0.0E+00 | Macrophage | ZNF385A  |
| HLA-DMB.5  | 0.0E+00 | 1.6E+00 | 7.8E-01 | 1.4E-01 | 0.0E+00 | Macrophage | HLA-DMB  |
| CTSZ.4     | 0.0E+00 | 1.6E+00 | 8.1E-01 | 1.0E-01 | 0.0E+00 | Macrophage | CTSZ     |
| LILRB4.1   | 0.0E+00 | 1.6E+00 | 6.9E-01 | 1.3E-02 | 0.0E+00 | Macrophage | LILRB4   |
| ALDH2.1    | 0.0E+00 | 1.6E+00 | 6.8E-01 | 2.0E-02 | 0.0E+00 | Macrophage | ALDH2    |
| ODF3B.1    | 0.0E+00 | 1.6E+00 | 7.6E-01 | 2.0E-01 | 0.0E+00 | Macrophage | ODF3B    |
| LGALS1.3   | 0.0E+00 | 1.6E+00 | 9.6E-01 | 5.4E-01 | 0.0E+00 | Macrophage | LGALS1   |
| S100A6.2   | 0.0E+00 | 1.6E+00 | 9.9E-01 | 9.2E-01 | 0.0E+00 | Macrophage | S100A6   |
| LILRB3     | 0.0E+00 | 1.6E+00 | 6.8E-01 | 9.0E-03 | 0.0E+00 | Macrophage | LILRB3   |
| NAMPT.1    | 0.0E+00 | 1.6E+00 | 6.5E-01 | 1.2E-01 | 0.0E+00 | Macrophage | NAMPT    |
| MARCO      | 0.0E+00 | 1.6E+00 | 5.1E-01 | 2.0E-03 | 0.0E+00 | Macrophage | MARCO    |
| CD302.1    | 0.0E+00 | 1.6E+00 | 6.7E-01 | 1.4E-02 | 0.0E+00 | Macrophage | CD302    |
| CEBPD.4    | 0.0E+00 | 1.6E+00 | 7.0E-01 | 1.4E-01 | 0.0E+00 | Macrophage | CEBPD    |
| CD300E     | 0.0E+00 | 1.5E+00 | 5.7E-01 | 4.0E-03 | 0.0E+00 | Macrophage | CD300E   |
| CPVL       | 0.0E+00 | 1.5E+00 | 6.8E-01 | 1.8E-02 | 0.0E+00 | Macrophage | CPVL     |
| BLVRB      | 0.0E+00 | 1.5E+00 | 7.5E-01 | 1.1E-01 | 0.0E+00 | Macrophage | BLVRB    |
| LYN.4      | 0.0E+00 | 1.5E+00 | 7.5E-01 | 6.5E-02 | 0.0E+00 | Macrophage | LYN      |
| BCL2A1.3   | 0.0E+00 | 1.5E+00 | 7.1E-01 | 1.2E-01 | 0.0E+00 | Macrophage | BCL2A1   |
| CTSH.4     | 0.0E+00 | 1.5E+00 | 8.6E-01 | 2.4E-01 | 0.0E+00 | Macrophage | CTSH     |
| SLC16A3.2  | 0.0E+00 | 1.5E+00 | 7.9E-01 | 1.9E-01 | 0.0E+00 | Macrophage | SLC16A3  |
| CD63.3     | 0.0E+00 | 1.5E+00 | 9.1E-01 | 4.3E-01 | 0.0E+00 | Macrophage | CD63     |
| PLAUR.1    | 0.0E+00 | 1.5E+00 | 6.2E-01 | 2.9E-02 | 0.0E+00 | Macrophage | PLAUR    |
| LGALS2     | 0.0E+00 | 1.5E+00 | 5.6E-01 | 2.1E-02 | 0.0E+00 | Macrophage | LGALS2   |
| CD93       | 0.0E+00 | 1.5E+00 | 6.0E-01 | 1.3E-02 | 0.0E+00 | Macrophage | CD93     |
| TUBA1B.6   | 0.0E+00 | 1.5E+00 | 9.2E-01 | 5.8E-01 | 0.0E+00 | Macrophage | TUBA1B   |
| NEAT1.3    | 0.0E+00 | 1.5E+00 | 9.2E-01 | 5.1E-01 | 0.0E+00 | Macrophage | NEAT1    |
| SLC7A7.2   | 0.0E+00 | 1.5E+00 | 6.6E-01 | 1.2E-02 | 0.0E+00 | Macrophage | SLC7A7   |
| TLR2       | 0.0E+00 | 1.5E+00 | 6.4E-01 | 6.0E-03 | 0.0E+00 | Macrophage | TLR2     |
| CFP        | 0.0E+00 | 1.5E+00 | 6.3E-01 | 4.2E-02 | 0.0E+00 | Macrophage | CFP      |
| LGALS9.4   | 0.0E+00 | 1.5E+00 | 8.1E-01 | 1.7E-01 | 0.0E+00 | Macrophage | LGALS9   |
| SYK.4      | 0.0E+00 | 1.5E+00 | 7.3E-01 | 5.1E-02 | 0.0E+00 | Macrophage | SYK      |

|            |         |         |         |         |         |            |            |
|------------|---------|---------|---------|---------|---------|------------|------------|
| FCGR1B     | 0.0E+00 | 1.5E+00 | 6.1E-01 | 4.0E-03 | 0.0E+00 | Macrophage | FCGR1B     |
| LRR25.1    | 0.0E+00 | 1.4E+00 | 6.6E-01 | 1.0E-02 | 0.0E+00 | Macrophage | LRR25      |
| GSN.4      | 0.0E+00 | 1.4E+00 | 6.6E-01 | 5.8E-02 | 0.0E+00 | Macrophage | GSN        |
| CD86.2     | 0.0E+00 | 1.4E+00 | 6.6E-01 | 3.8E-02 | 0.0E+00 | Macrophage | CD86       |
| PLSCR1.4   | 0.0E+00 | 1.4E+00 | 7.9E-01 | 1.8E-01 | 0.0E+00 | Macrophage | PLSCR1     |
| DUSP6.1    | 0.0E+00 | 1.4E+00 | 6.3E-01 | 1.1E-01 | 0.0E+00 | Macrophage | DUSP6      |
| MEF2C.4    | 0.0E+00 | 1.4E+00 | 7.1E-01 | 4.9E-02 | 0.0E+00 | Macrophage | MEF2C      |
| RETN       | 0.0E+00 | 1.4E+00 | 2.9E-01 | 1.0E-03 | 0.0E+00 | Macrophage | RETN       |
| PYCARD.3   | 0.0E+00 | 1.4E+00 | 8.1E-01 | 3.6E-01 | 0.0E+00 | Macrophage | PYCARD     |
| RASSF4     | 0.0E+00 | 1.4E+00 | 6.2E-01 | 2.7E-02 | 0.0E+00 | Macrophage | RASSF4     |
| RAC1.1     | 0.0E+00 | 1.4E+00 | 9.0E-01 | 4.9E-01 | 0.0E+00 | Macrophage | RAC1       |
| ITGAM.2    | 0.0E+00 | 1.4E+00 | 6.7E-01 | 3.9E-02 | 0.0E+00 | Macrophage | ITGAM      |
| TMEM176A   | 0.0E+00 | 1.4E+00 | 4.5E-01 | 5.0E-03 | 0.0E+00 | Macrophage | TMEM176A   |
| IL4I1      | 0.0E+00 | 1.4E+00 | 4.9E-01 | 5.3E-02 | 0.0E+00 | Macrophage | IL4I1      |
| STXBP2.1   | 0.0E+00 | 1.4E+00 | 8.3E-01 | 3.3E-01 | 0.0E+00 | Macrophage | STXBP2     |
| STAB1      | 0.0E+00 | 1.3E+00 | 5.1E-01 | 2.0E-03 | 0.0E+00 | Macrophage | STAB1      |
| SLC25A37   | 0.0E+00 | 1.3E+00 | 5.1E-01 | 5.2E-02 | 0.0E+00 | Macrophage | SLC25A37   |
| CCDC88A.2  | 0.0E+00 | 1.3E+00 | 6.7E-01 | 4.9E-02 | 0.0E+00 | Macrophage | CCDC88A    |
| EGR1.1     | 0.0E+00 | 1.3E+00 | 5.5E-01 | 5.8E-02 | 0.0E+00 | Macrophage | EGR1       |
| LTA4H      | 0.0E+00 | 1.3E+00 | 7.1E-01 | 2.0E-01 | 0.0E+00 | Macrophage | LTA4H      |
| VAMP8.5    | 0.0E+00 | 1.3E+00 | 9.3E-01 | 6.5E-01 | 0.0E+00 | Macrophage | VAMP8      |
| ATP6V0C.2  | 0.0E+00 | 1.3E+00 | 9.0E-01 | 5.2E-01 | 0.0E+00 | Macrophage | ATP6V0C    |
| ANKRD22    | 0.0E+00 | 1.3E+00 | 4.5E-01 | 7.0E-03 | 0.0E+00 | Macrophage | ANKRD22    |
| HNMT       | 0.0E+00 | 1.3E+00 | 6.2E-01 | 7.0E-03 | 0.0E+00 | Macrophage | HNMT       |
| DSE.1      | 0.0E+00 | 1.3E+00 | 6.4E-01 | 5.7E-02 | 0.0E+00 | Macrophage | DSE        |
| PLBD1      | 0.0E+00 | 1.3E+00 | 5.7E-01 | 1.2E-02 | 0.0E+00 | Macrophage | PLBD1      |
| SIRPA      | 0.0E+00 | 1.3E+00 | 6.0E-01 | 1.0E-02 | 0.0E+00 | Macrophage | SIRPA      |
| CXCL16     | 0.0E+00 | 1.3E+00 | 5.6E-01 | 2.5E-02 | 0.0E+00 | Macrophage | CXCL16     |
| PGD.1      | 0.0E+00 | 1.3E+00 | 7.1E-01 | 1.5E-01 | 0.0E+00 | Macrophage | PGD        |
| LILRA2     | 0.0E+00 | 1.3E+00 | 5.7E-01 | 9.0E-03 | 0.0E+00 | Macrophage | LILRA2     |
| GRB2.3     | 0.0E+00 | 1.3E+00 | 8.7E-01 | 3.5E-01 | 0.0E+00 | Macrophage | GRB2       |
| HRH2.1     | 0.0E+00 | 1.3E+00 | 5.8E-01 | 3.4E-02 | 0.0E+00 | Macrophage | HRH2       |
| ASGR1      | 0.0E+00 | 1.3E+00 | 5.5E-01 | 4.0E-03 | 0.0E+00 | Macrophage | ASGR1      |
| TNFAIP2    | 0.0E+00 | 1.3E+00 | 5.0E-01 | 6.0E-03 | 0.0E+00 | Macrophage | TNFAIP2    |
| MYOF       | 0.0E+00 | 1.3E+00 | 5.3E-01 | 1.5E-02 | 0.0E+00 | Macrophage | MYOF       |
| CDKN1A.3   | 0.0E+00 | 1.3E+00 | 5.3E-01 | 5.5E-02 | 0.0E+00 | Macrophage | CDKN1A     |
| GK         | 0.0E+00 | 1.3E+00 | 6.0E-01 | 5.5E-02 | 0.0E+00 | Macrophage | GK         |
| CEBPB.2    | 0.0E+00 | 1.3E+00 | 7.2E-01 | 1.9E-01 | 0.0E+00 | Macrophage | CEBPB      |
| AP2S1      | 0.0E+00 | 1.3E+00 | 8.9E-01 | 4.2E-01 | 0.0E+00 | Macrophage | AP2S1      |
| PTAFR.1    | 0.0E+00 | 1.2E+00 | 5.9E-01 | 1.8E-02 | 0.0E+00 | Macrophage | PTAFR      |
| RBM47.1    | 0.0E+00 | 1.2E+00 | 5.7E-01 | 1.4E-02 | 0.0E+00 | Macrophage | RBM47      |
| AC020656.1 | 0.0E+00 | 1.2E+00 | 4.9E-01 | 7.0E-03 | 0.0E+00 | Macrophage | AC020656.1 |
| LAIR1.3    | 0.0E+00 | 1.2E+00 | 6.8E-01 | 1.3E-01 | 0.0E+00 | Macrophage | LAIR1      |
| PSTPIP2    | 0.0E+00 | 1.2E+00 | 6.4E-01 | 5.9E-02 | 0.0E+00 | Macrophage | PSTPIP2    |
| DMXL2.1    | 0.0E+00 | 1.2E+00 | 5.1E-01 | 5.0E-03 | 0.0E+00 | Macrophage | DMXL2      |
| EPB41L3    | 0.0E+00 | 1.2E+00 | 5.6E-01 | 6.0E-03 | 0.0E+00 | Macrophage | EPB41L3    |

|           |         |         |         |         |         |            |          |
|-----------|---------|---------|---------|---------|---------|------------|----------|
| CCR1.2    | 0.0E+00 | 1.2E+00 | 6.1E-01 | 6.7E-02 | 0.0E+00 | Macrophage | CCR1     |
| PLEKHO1.3 | 0.0E+00 | 1.2E+00 | 7.5E-01 | 1.7E-01 | 0.0E+00 | Macrophage | PLEKHO1  |
| SNX10.2   | 0.0E+00 | 1.2E+00 | 7.1E-01 | 1.6E-01 | 0.0E+00 | Macrophage | SNX10    |
| SLC8A1    | 0.0E+00 | 1.2E+00 | 5.3E-01 | 1.3E-02 | 0.0E+00 | Macrophage | SLC8A1   |
| ADGRE2.1  | 0.0E+00 | 1.2E+00 | 5.1E-01 | 6.0E-03 | 0.0E+00 | Macrophage | ADGRE2   |
| ADM       | 0.0E+00 | 1.2E+00 | 3.3E-01 | 1.0E-03 | 0.0E+00 | Macrophage | ADM      |
| SCIMP.1   | 0.0E+00 | 1.2E+00 | 6.0E-01 | 3.5E-02 | 0.0E+00 | Macrophage | SCIMP    |
| IL17RA.2  | 0.0E+00 | 1.2E+00 | 7.7E-01 | 1.9E-01 | 0.0E+00 | Macrophage | IL17RA   |
| THEMIS2.2 | 0.0E+00 | 1.2E+00 | 6.7E-01 | 1.1E-01 | 0.0E+00 | Macrophage | THEMIS2  |
| ADAP2     | 0.0E+00 | 1.2E+00 | 5.2E-01 | 1.4E-02 | 0.0E+00 | Macrophage | ADAP2    |
| IL13RA1.2 | 0.0E+00 | 1.2E+00 | 5.3E-01 | 1.5E-02 | 0.0E+00 | Macrophage | IL13RA1  |
| PRAM1.1   | 0.0E+00 | 1.1E+00 | 5.2E-01 | 1.1E-02 | 0.0E+00 | Macrophage | PRAM1    |
| BRI3.1    | 0.0E+00 | 1.1E+00 | 6.3E-01 | 9.8E-02 | 0.0E+00 | Macrophage | BRI3     |
| TLR4      | 0.0E+00 | 1.1E+00 | 5.1E-01 | 3.0E-03 | 0.0E+00 | Macrophage | TLR4     |
| TIMP2.1   | 0.0E+00 | 1.1E+00 | 5.6E-01 | 1.5E-02 | 0.0E+00 | Macrophage | TIMP2    |
| KLF4      | 0.0E+00 | 1.1E+00 | 5.0E-01 | 1.3E-02 | 0.0E+00 | Macrophage | KLF4     |
| HSPA6     | 0.0E+00 | 1.1E+00 | 5.1E-01 | 9.0E-03 | 0.0E+00 | Macrophage | HSPA6    |
| MS4A7.1   | 0.0E+00 | 1.1E+00 | 4.3E-01 | 1.4E-02 | 0.0E+00 | Macrophage | MS4A7    |
| PLEK.6    | 0.0E+00 | 1.1E+00 | 6.9E-01 | 1.5E-01 | 0.0E+00 | Macrophage | PLEK     |
| PHC2      | 0.0E+00 | 1.1E+00 | 5.1E-01 | 5.0E-02 | 0.0E+00 | Macrophage | PHC2     |
| LY86.2    | 0.0E+00 | 1.1E+00 | 6.0E-01 | 3.9E-02 | 0.0E+00 | Macrophage | LY86     |
| SULF2.1   | 0.0E+00 | 1.1E+00 | 5.2E-01 | 2.2E-02 | 0.0E+00 | Macrophage | SULF2    |
| IRAK3     | 0.0E+00 | 1.1E+00 | 5.2E-01 | 9.0E-03 | 0.0E+00 | Macrophage | IRAK3    |
| PTTG1P.1  | 0.0E+00 | 1.1E+00 | 7.2E-01 | 1.8E-01 | 0.0E+00 | Macrophage | PTTG1P   |
| LRRK2.1   | 0.0E+00 | 1.1E+00 | 5.0E-01 | 2.1E-02 | 0.0E+00 | Macrophage | LRRK2    |
| HK2       | 0.0E+00 | 1.1E+00 | 4.3E-01 | 2.0E-02 | 0.0E+00 | Macrophage | HK2      |
| PIK3AP1.3 | 0.0E+00 | 1.1E+00 | 5.7E-01 | 4.8E-02 | 0.0E+00 | Macrophage | PIK3AP1  |
| RNASE6.5  | 0.0E+00 | 1.1E+00 | 5.8E-01 | 6.2E-02 | 0.0E+00 | Macrophage | RNASE6   |
| GNAI2     | 0.0E+00 | 1.1E+00 | 9.1E-01 | 4.5E-01 | 0.0E+00 | Macrophage | GNAI2    |
| BACH1     | 0.0E+00 | 1.1E+00 | 5.6E-01 | 7.3E-02 | 0.0E+00 | Macrophage | BACH1    |
| ATP6V1B2  | 0.0E+00 | 1.1E+00 | 6.8E-01 | 1.4E-01 | 0.0E+00 | Macrophage | ATP6V1B2 |
| CD36.1    | 0.0E+00 | 1.1E+00 | 4.0E-01 | 1.0E-03 | 0.0E+00 | Macrophage | CD36     |
| C5AR1     | 0.0E+00 | 1.1E+00 | 4.1E-01 | 0.0E+00 | 0.0E+00 | Macrophage | C5AR1    |
| MS4A4A    | 0.0E+00 | 1.1E+00 | 4.2E-01 | 5.0E-03 | 0.0E+00 | Macrophage | MS4A4A   |
| GNG10.3   | 0.0E+00 | 1.1E+00 | 7.6E-01 | 2.5E-01 | 0.0E+00 | Macrophage | GNG10    |
| PTPRE.4   | 0.0E+00 | 1.1E+00 | 7.2E-01 | 1.9E-01 | 0.0E+00 | Macrophage | PTPRE    |
| MRC1      | 0.0E+00 | 1.1E+00 | 3.7E-01 | 9.0E-03 | 0.0E+00 | Macrophage | MRC1     |
| C19orf38  | 0.0E+00 | 1.1E+00 | 5.4E-01 | 1.9E-02 | 0.0E+00 | Macrophage | C19orf38 |
| SLC31A2   | 0.0E+00 | 1.1E+00 | 5.2E-01 | 2.6E-02 | 0.0E+00 | Macrophage | SLC31A2  |
| FPR2      | 0.0E+00 | 1.1E+00 | 4.5E-01 | 1.0E-03 | 0.0E+00 | Macrophage | FPR2     |
| HK3       | 0.0E+00 | 1.1E+00 | 5.0E-01 | 2.0E-03 | 0.0E+00 | Macrophage | HK3      |
| RGS2      | 0.0E+00 | 1.1E+00 | 4.3E-01 | 7.9E-02 | 0.0E+00 | Macrophage | RGS2     |
| CD33      | 0.0E+00 | 1.1E+00 | 5.3E-01 | 1.8E-02 | 0.0E+00 | Macrophage | CD33     |
| ETS2      | 0.0E+00 | 1.1E+00 | 5.2E-01 | 4.2E-02 | 0.0E+00 | Macrophage | ETS2     |
| CLEC4A    | 0.0E+00 | 1.1E+00 | 5.2E-01 | 1.7E-02 | 0.0E+00 | Macrophage | CLEC4A   |
| EFHD2.1   | 0.0E+00 | 1.0E+00 | 7.8E-01 | 2.6E-01 | 0.0E+00 | Macrophage | EFHD2    |

|              |          |         |         |         |          |            |            |
|--------------|----------|---------|---------|---------|----------|------------|------------|
| LTBR         | 0.0E+00  | 1.0E+00 | 5.1E-01 | 1.0E-02 | 0.0E+00  | Macrophage | LTBR       |
| GNS          | 0.0E+00  | 1.0E+00 | 6.3E-01 | 7.8E-02 | 0.0E+00  | Macrophage | GNS        |
| TBXAS1.1     | 0.0E+00  | 1.0E+00 | 6.7E-01 | 1.1E-01 | 0.0E+00  | Macrophage | TBXAS1     |
| FLOT1.1      | 0.0E+00  | 1.0E+00 | 7.3E-01 | 1.9E-01 | 0.0E+00  | Macrophage | FLOT1      |
| CDA          | 0.0E+00  | 1.0E+00 | 4.0E-01 | 2.0E-03 | 0.0E+00  | Macrophage | CDA        |
| AL034397.3.2 | 0.0E+00  | 1.0E+00 | 4.7E-01 | 3.8E-02 | 0.0E+00  | Macrophage | AL034397.3 |
| ADA2.1       | 0.0E+00  | 1.0E+00 | 7.5E-01 | 2.1E-01 | 0.0E+00  | Macrophage | ADA2       |
| EMILIN2      | 0.0E+00  | 1.0E+00 | 5.6E-01 | 4.0E-02 | 0.0E+00  | Macrophage | EMILIN2    |
| SDCBP.2      | 0.0E+00  | 1.0E+00 | 8.0E-01 | 2.8E-01 | 0.0E+00  | Macrophage | SDCBP      |
| OAZ1.5       | 0.0E+00  | 1.0E+00 | 9.9E-01 | 9.4E-01 | 0.0E+00  | Macrophage | OAZ1       |
| RNASE2       | 0.0E+00  | 1.0E+00 | 4.0E-01 | 1.0E-03 | 0.0E+00  | Macrophage | RNASE2     |
| NAGK.2       | 0.0E+00  | 1.0E+00 | 6.9E-01 | 1.4E-01 | 0.0E+00  | Macrophage | NAGK       |
| KIAA0930.1   | 0.0E+00  | 1.0E+00 | 5.5E-01 | 4.6E-02 | 0.0E+00  | Macrophage | KIAA0930   |
| IFIT3        | 0.0E+00  | 1.0E+00 | 4.1E-01 | 4.1E-02 | 0.0E+00  | Macrophage | IFIT3      |
| PEA15.2      | 0.0E+00  | 1.0E+00 | 6.0E-01 | 1.1E-01 | 0.0E+00  | Macrophage | PEA15      |
| TREM1        | 0.0E+00  | 1.0E+00 | 3.8E-01 | 1.0E-03 | 0.0E+00  | Macrophage | TREM1      |
| PAK1.2       | 0.0E+00  | 1.0E+00 | 5.9E-01 | 7.7E-02 | 0.0E+00  | Macrophage | PAK1       |
| SCO2         | 0.0E+00  | 1.0E+00 | 5.6E-01 | 1.0E-01 | 0.0E+00  | Macrophage | SCO2       |
| GNG5.1       | 4.3E-306 | 1.1E+00 | 9.3E-01 | 6.0E-01 | 6.7E-302 | Macrophage | GNG5       |
| BNIP3L       | 7.3E-302 | 1.2E+00 | 8.5E-01 | 4.0E-01 | 1.1E-297 | Macrophage | BNIP3L     |
| TPI1.3       | 1.3E-301 | 1.0E+00 | 9.7E-01 | 8.1E-01 | 1.9E-297 | Macrophage | TPI1       |
| WSB1.2       | 3.8E-296 | 1.2E+00 | 8.7E-01 | 4.4E-01 | 5.9E-292 | Macrophage | WSB1       |
| SRGN.3       | 6.0E-291 | 1.1E+00 | 9.8E-01 | 8.6E-01 | 9.4E-287 | Macrophage | SRGN       |
| NCF1.5       | 5.2E-287 | 1.4E+00 | 8.1E-01 | 3.6E-01 | 8.2E-283 | Macrophage | NCF1       |
| GSTP1.5      | 7.0E-282 | 1.1E+00 | 9.1E-01 | 5.7E-01 | 1.1E-277 | Macrophage | GSTP1      |
| IFI6.3       | 1.9E-280 | 1.2E+00 | 7.6E-01 | 3.0E-01 | 3.0E-276 | Macrophage | IFI6       |
| S100A10.4    | 6.8E-273 | 1.2E+00 | 9.8E-01 | 8.0E-01 | 1.1E-268 | Macrophage | S100A10    |
| DUSP1.3      | 3.0E-247 | 1.1E+00 | 7.7E-01 | 3.4E-01 | 4.7E-243 | Macrophage | DUSP1      |
| TUBA1A.4     | 8.4E-244 | 1.4E+00 | 8.3E-01 | 4.5E-01 | 1.3E-239 | Macrophage | TUBA1A     |
| ANXA2.4      | 2.2E-236 | 1.0E+00 | 9.1E-01 | 5.8E-01 | 3.4E-232 | Macrophage | ANXA2      |
| GBP1.4       | 3.5E-210 | 1.0E+00 | 7.4E-01 | 3.2E-01 | 5.4E-206 | Macrophage | GBP1       |
| RNASET2.5    | 3.3E-199 | 1.0E+00 | 8.5E-01 | 5.1E-01 | 5.2E-195 | Macrophage | RNASET2    |
| IFI27        | 1.5E-106 | 1.2E+00 | 1.3E-01 | 2.5E-02 | 2.3E-102 | Macrophage | IFI27      |
| MT2A.4       | 5.7E-91  | 1.6E+00 | 8.5E-01 | 6.6E-01 | 9.0E-87  | Macrophage | MT2A       |
| CST3.4       | 0.0E+00  | 5.8E+00 | 9.4E-01 | 7.0E-02 | 0.0E+00  | cDC        | CST3       |
| HLA-DQA1.6   | 0.0E+00  | 4.2E+00 | 9.9E-01 | 2.5E-01 | 0.0E+00  | cDC        | HLA-DQA1   |
| HLA-DRA.6    | 0.0E+00  | 4.2E+00 | 1.0E+00 | 4.2E-01 | 0.0E+00  | cDC        | HLA-DRA    |
| HLA-DPB1.7   | 0.0E+00  | 4.1E+00 | 1.0E+00 | 6.2E-01 | 0.0E+00  | cDC        | HLA-DPB1   |
| HLA-DQB1.5   | 0.0E+00  | 4.0E+00 | 9.9E-01 | 3.4E-01 | 0.0E+00  | cDC        | HLA-DQB1   |
| HLA-DPA1.8   | 0.0E+00  | 4.0E+00 | 1.0E+00 | 6.3E-01 | 0.0E+00  | cDC        | HLA-DPA1   |
| HLA-DRB1.7   | 0.0E+00  | 3.7E+00 | 1.0E+00 | 5.8E-01 | 0.0E+00  | cDC        | HLA-DRB1   |
| CD74.7       | 0.0E+00  | 3.6E+00 | 1.0E+00 | 9.3E-01 | 0.0E+00  | cDC        | CD74       |
| S100B.3      | 0.0E+00  | 3.3E+00 | 5.2E-01 | 5.5E-02 | 0.0E+00  | cDC        | S100B      |
| CPVL.1       | 0.0E+00  | 3.2E+00 | 6.8E-01 | 2.6E-02 | 0.0E+00  | cDC        | CPVL       |
| IFI30.7      | 0.0E+00  | 3.2E+00 | 9.3E-01 | 1.4E-01 | 0.0E+00  | cDC        | IFI30      |
| MS4A6A.2     | 0.0E+00  | 3.2E+00 | 7.3E-01 | 4.4E-02 | 0.0E+00  | cDC        | MS4A6A     |

|            |         |         |         |         |         |     |          |
|------------|---------|---------|---------|---------|---------|-----|----------|
| IFITM3.7   | 0.0E+00 | 2.9E+00 | 7.1E-01 | 1.6E-01 | 0.0E+00 | cDC | IFITM3   |
| HLA-DRB5.4 | 0.0E+00 | 2.9E+00 | 8.9E-01 | 1.9E-01 | 0.0E+00 | cDC | HLA-DRB5 |
| SPI1.4     | 0.0E+00 | 2.8E+00 | 8.7E-01 | 5.6E-02 | 0.0E+00 | cDC | SPI1     |
| CD1C.2     | 0.0E+00 | 2.8E+00 | 4.6E-01 | 1.5E-02 | 0.0E+00 | cDC | CD1C     |
| LGALS2.1   | 0.0E+00 | 2.8E+00 | 7.2E-01 | 2.4E-02 | 0.0E+00 | cDC | LGALS2   |
| LYZ.2      | 0.0E+00 | 2.7E+00 | 8.7E-01 | 4.9E-02 | 0.0E+00 | cDC | LYZ      |
| GSN.5      | 0.0E+00 | 2.6E+00 | 8.4E-01 | 6.2E-02 | 0.0E+00 | cDC | GSN      |
| HLA-DMA.4  | 0.0E+00 | 2.6E+00 | 9.3E-01 | 2.7E-01 | 0.0E+00 | cDC | HLA-DMA  |
| CLEC10A.1  | 0.0E+00 | 2.6E+00 | 4.7E-01 | 2.0E-02 | 0.0E+00 | cDC | CLEC10A  |
| AIF1.4     | 0.0E+00 | 2.5E+00 | 8.5E-01 | 1.1E-01 | 0.0E+00 | cDC | AIF1     |
| FCER1A.2   | 0.0E+00 | 2.4E+00 | 4.4E-01 | 5.0E-03 | 0.0E+00 | cDC | FCER1A   |
| LST1.6     | 0.0E+00 | 2.3E+00 | 8.0E-01 | 1.6E-01 | 0.0E+00 | cDC | LST1     |
| C1orf54    | 0.0E+00 | 2.3E+00 | 4.6E-01 | 2.2E-02 | 0.0E+00 | cDC | C1orf54  |
| C15orf48.1 | 0.0E+00 | 2.3E+00 | 6.0E-01 | 2.2E-02 | 0.0E+00 | cDC | C15orf48 |
| IRF8.3     | 0.0E+00 | 2.2E+00 | 4.5E-01 | 4.6E-02 | 0.0E+00 | cDC | IRF8     |
| FGL2.3     | 0.0E+00 | 2.2E+00 | 8.1E-01 | 7.4E-02 | 0.0E+00 | cDC | FGL2     |
| GRN.7      | 0.0E+00 | 2.2E+00 | 8.8E-01 | 1.9E-01 | 0.0E+00 | cDC | GRN      |
| HLA-DMB.6  | 0.0E+00 | 2.2E+00 | 8.7E-01 | 1.5E-01 | 0.0E+00 | cDC | HLA-DMB  |
| GSTP1.6    | 0.0E+00 | 2.1E+00 | 9.3E-01 | 5.8E-01 | 0.0E+00 | cDC | GSTP1    |
| FOS.4      | 0.0E+00 | 2.1E+00 | 8.7E-01 | 1.9E-01 | 0.0E+00 | cDC | FOS      |
| FCER1G.8   | 0.0E+00 | 2.0E+00 | 7.2E-01 | 9.2E-02 | 0.0E+00 | cDC | FCER1G   |
| IDO1       | 0.0E+00 | 2.0E+00 | 5.2E-01 | 5.0E-03 | 0.0E+00 | cDC | IDO1     |
| CD1E       | 0.0E+00 | 2.0E+00 | 3.8E-01 | 2.0E-03 | 0.0E+00 | cDC | CD1E     |
| CXCL16.1   | 0.0E+00 | 1.9E+00 | 6.3E-01 | 3.0E-02 | 0.0E+00 | cDC | CXCL16   |
| RNASE6.6   | 0.0E+00 | 1.9E+00 | 7.1E-01 | 6.5E-02 | 0.0E+00 | cDC | RNASE6   |
| FCGR2B.3   | 0.0E+00 | 1.9E+00 | 4.4E-01 | 4.8E-02 | 0.0E+00 | cDC | FCGR2B   |
| TYROBP.6   | 0.0E+00 | 1.8E+00 | 7.1E-01 | 1.1E-01 | 0.0E+00 | cDC | TYROBP   |
| ATF5.7     | 0.0E+00 | 1.8E+00 | 6.7E-01 | 1.1E-01 | 0.0E+00 | cDC | ATF5     |
| NPC2.5     | 0.0E+00 | 1.8E+00 | 8.6E-01 | 2.9E-01 | 0.0E+00 | cDC | NPC2     |
| PAK1.3     | 0.0E+00 | 1.8E+00 | 7.8E-01 | 7.9E-02 | 0.0E+00 | cDC | PAK1     |
| CDKN1A.4   | 0.0E+00 | 1.8E+00 | 4.6E-01 | 6.3E-02 | 0.0E+00 | cDC | CDKN1A   |
| HCK.3      | 0.0E+00 | 1.8E+00 | 7.9E-01 | 4.3E-02 | 0.0E+00 | cDC | HCK      |
| CCND1      | 0.0E+00 | 1.7E+00 | 4.8E-01 | 8.0E-03 | 0.0E+00 | cDC | CCND1    |
| CCDC88A.3  | 0.0E+00 | 1.7E+00 | 7.8E-01 | 5.4E-02 | 0.0E+00 | cDC | CCDC88A  |
| RAB31.4    | 0.0E+00 | 1.7E+00 | 7.4E-01 | 5.0E-02 | 0.0E+00 | cDC | RAB31    |
| IGSF6.1    | 0.0E+00 | 1.7E+00 | 4.7E-01 | 2.9E-02 | 0.0E+00 | cDC | IGSF6    |
| WDFY4.2    | 0.0E+00 | 1.7E+00 | 4.9E-01 | 2.2E-02 | 0.0E+00 | cDC | WDFY4    |
| NET1.1     | 0.0E+00 | 1.7E+00 | 5.9E-01 | 2.5E-02 | 0.0E+00 | cDC | NET1     |
| MNDA.1     | 0.0E+00 | 1.7E+00 | 7.2E-01 | 4.0E-02 | 0.0E+00 | cDC | MNDA     |
| MPEG1.3    | 0.0E+00 | 1.7E+00 | 5.3E-01 | 4.2E-02 | 0.0E+00 | cDC | MPEG1    |
| MARCH1.4   | 0.0E+00 | 1.7E+00 | 7.4E-01 | 5.0E-02 | 0.0E+00 | cDC | MARCH1   |
| C1orf162.7 | 0.0E+00 | 1.7E+00 | 7.8E-01 | 1.6E-01 | 0.0E+00 | cDC | C1orf162 |
| CSF2RA.2   | 0.0E+00 | 1.7E+00 | 6.9E-01 | 1.6E-02 | 0.0E+00 | cDC | CSF2RA   |
| CLEC9A     | 0.0E+00 | 1.7E+00 | 3.0E-01 | 1.0E-03 | 0.0E+00 | cDC | CLEC9A   |
| SPINT2.5   | 0.0E+00 | 1.6E+00 | 7.5E-01 | 1.2E-01 | 0.0E+00 | cDC | SPINT2   |
| LY86.3     | 0.0E+00 | 1.6E+00 | 7.4E-01 | 4.2E-02 | 0.0E+00 | cDC | LY86     |

|            |         |         |         |         |         |     |          |
|------------|---------|---------|---------|---------|---------|-----|----------|
| CD86.3     | 0.0E+00 | 1.6E+00 | 6.9E-01 | 4.6E-02 | 0.0E+00 | cDC | CD86     |
| CIITA.4    | 0.0E+00 | 1.6E+00 | 7.6E-01 | 5.5E-02 | 0.0E+00 | cDC | CIITA    |
| WARS.3     | 0.0E+00 | 1.6E+00 | 7.5E-01 | 1.7E-01 | 0.0E+00 | cDC | WARS     |
| CLEC7A.1   | 0.0E+00 | 1.6E+00 | 7.0E-01 | 4.1E-02 | 0.0E+00 | cDC | CLEC7A   |
| FCGRT.5    | 0.0E+00 | 1.5E+00 | 7.4E-01 | 9.0E-02 | 0.0E+00 | cDC | FCGRT    |
| BASP1.3    | 0.0E+00 | 1.5E+00 | 6.7E-01 | 3.0E-02 | 0.0E+00 | cDC | BASP1    |
| HLA-DQA2.2 | 0.0E+00 | 1.5E+00 | 6.3E-01 | 3.2E-02 | 0.0E+00 | cDC | HLA-DQA2 |
| HLA-DQB2.2 | 0.0E+00 | 1.5E+00 | 5.4E-01 | 2.0E-02 | 0.0E+00 | cDC | HLA-DQB2 |
| ALDH2.2    | 0.0E+00 | 1.5E+00 | 6.1E-01 | 3.0E-02 | 0.0E+00 | cDC | ALDH2    |
| ZNF385A.1  | 0.0E+00 | 1.5E+00 | 7.1E-01 | 3.1E-02 | 0.0E+00 | cDC | ZNF385A  |
| ITGAX.2    | 0.0E+00 | 1.5E+00 | 6.8E-01 | 4.0E-02 | 0.0E+00 | cDC | ITGAX    |
| LGALS9.5   | 0.0E+00 | 1.5E+00 | 8.1E-01 | 1.8E-01 | 0.0E+00 | cDC | LGALS9   |
| VMO1       | 0.0E+00 | 1.5E+00 | 3.5E-01 | 3.0E-03 | 0.0E+00 | cDC | VMO1     |
| CTSZ.5     | 0.0E+00 | 1.4E+00 | 7.5E-01 | 1.1E-01 | 0.0E+00 | cDC | CTSZ     |
| PTPRE.5    | 0.0E+00 | 1.4E+00 | 7.2E-01 | 2.0E-01 | 0.0E+00 | cDC | PTPRE    |
| SHTN1.2    | 0.0E+00 | 1.4E+00 | 5.9E-01 | 2.0E-02 | 0.0E+00 | cDC | SHTN1    |
| MEF2C.5    | 0.0E+00 | 1.4E+00 | 6.4E-01 | 5.9E-02 | 0.0E+00 | cDC | MEF2C    |
| LAP3.4     | 0.0E+00 | 1.4E+00 | 8.0E-01 | 2.6E-01 | 0.0E+00 | cDC | LAP3     |
| CALHM6.5   | 0.0E+00 | 1.4E+00 | 6.4E-01 | 8.4E-02 | 0.0E+00 | cDC | CALHM6   |
| CD68.4     | 0.0E+00 | 1.4E+00 | 7.0E-01 | 6.4E-02 | 0.0E+00 | cDC | CD68     |
| HLA-DOA.3  | 0.0E+00 | 1.4E+00 | 7.1E-01 | 3.7E-02 | 0.0E+00 | cDC | HLA-DOA  |
| PLD4.2     | 0.0E+00 | 1.4E+00 | 4.5E-01 | 2.2E-02 | 0.0E+00 | cDC | PLD4     |
| GCA.5      | 0.0E+00 | 1.4E+00 | 7.2E-01 | 9.4E-02 | 0.0E+00 | cDC | GCA      |
| IL18.1     | 0.0E+00 | 1.4E+00 | 5.9E-01 | 2.2E-02 | 0.0E+00 | cDC | IL18     |
| SERPINA1.1 | 0.0E+00 | 1.3E+00 | 4.5E-01 | 3.8E-02 | 0.0E+00 | cDC | SERPINA1 |
| XCR1       | 0.0E+00 | 1.3E+00 | 2.8E-01 | 0.0E+00 | 0.0E+00 | cDC | XCR1     |
| MRC1.1     | 0.0E+00 | 1.3E+00 | 3.1E-01 | 1.5E-02 | 0.0E+00 | cDC | MRC1     |
| RAB32.1    | 0.0E+00 | 1.3E+00 | 4.8E-01 | 1.9E-02 | 0.0E+00 | cDC | RAB32    |
| P2RY6.2    | 0.0E+00 | 1.3E+00 | 6.2E-01 | 1.3E-02 | 0.0E+00 | cDC | P2RY6    |
| CD72.2     | 0.0E+00 | 1.3E+00 | 6.0E-01 | 3.5E-02 | 0.0E+00 | cDC | CD72     |
| PLSCR1.5   | 0.0E+00 | 1.3E+00 | 7.2E-01 | 1.9E-01 | 0.0E+00 | cDC | PLSCR1   |
| DNASE1L3.1 | 0.0E+00 | 1.3E+00 | 2.3E-01 | 1.0E-03 | 0.0E+00 | cDC | DNASE1L3 |
| PLEK.7     | 0.0E+00 | 1.2E+00 | 7.7E-01 | 1.5E-01 | 0.0E+00 | cDC | PLEK     |
| SLC8A1.1   | 0.0E+00 | 1.2E+00 | 5.2E-01 | 2.0E-02 | 0.0E+00 | cDC | SLC8A1   |
| SCIMP.2    | 0.0E+00 | 1.2E+00 | 6.2E-01 | 4.1E-02 | 0.0E+00 | cDC | SCIMP    |
| PPP1R14A.2 | 0.0E+00 | 1.2E+00 | 3.1E-01 | 9.0E-03 | 0.0E+00 | cDC | PPP1R14A |
| RASSF4.1   | 0.0E+00 | 1.2E+00 | 4.9E-01 | 3.7E-02 | 0.0E+00 | cDC | RASSF4   |
| SLAMF8.1   | 0.0E+00 | 1.2E+00 | 5.7E-01 | 3.9E-02 | 0.0E+00 | cDC | SLAMF8   |
| DSE.2      | 0.0E+00 | 1.2E+00 | 6.3E-01 | 6.4E-02 | 0.0E+00 | cDC | DSE      |
| GPAT3.1    | 0.0E+00 | 1.2E+00 | 5.4E-01 | 2.0E-02 | 0.0E+00 | cDC | GPAT3    |
| CLEC4A.1   | 0.0E+00 | 1.2E+00 | 4.9E-01 | 2.5E-02 | 0.0E+00 | cDC | CLEC4A   |
| CSF1R.2    | 0.0E+00 | 1.2E+00 | 4.2E-01 | 3.0E-02 | 0.0E+00 | cDC | CSF1R    |
| PRCP.2     | 0.0E+00 | 1.2E+00 | 7.2E-01 | 1.3E-01 | 0.0E+00 | cDC | PRCP     |
| CD83.1     | 0.0E+00 | 1.2E+00 | 3.8E-01 | 3.6E-02 | 0.0E+00 | cDC | CD83     |
| LYN.5      | 0.0E+00 | 1.2E+00 | 6.2E-01 | 7.7E-02 | 0.0E+00 | cDC | LYN      |
| EGLN3.1    | 0.0E+00 | 1.2E+00 | 4.4E-01 | 1.7E-02 | 0.0E+00 | cDC | EGLN3    |

|            |          |         |         |         |          |     |          |
|------------|----------|---------|---------|---------|----------|-----|----------|
| SULF2.2    | 0.0E+00  | 1.1E+00 | 6.2E-01 | 2.6E-02 | 0.0E+00  | cDC | SULF2    |
| KLF4.1     | 0.0E+00  | 1.1E+00 | 5.0E-01 | 1.9E-02 | 0.0E+00  | cDC | KLF4     |
| CFP.1      | 0.0E+00  | 1.1E+00 | 4.7E-01 | 5.3E-02 | 0.0E+00  | cDC | CFP      |
| CD33.1     | 0.0E+00  | 1.1E+00 | 5.6E-01 | 2.4E-02 | 0.0E+00  | cDC | CD33     |
| SMCO4.4    | 0.0E+00  | 1.1E+00 | 6.9E-01 | 1.2E-01 | 0.0E+00  | cDC | SMCO4    |
| FBP1.1     | 0.0E+00  | 1.1E+00 | 4.4E-01 | 3.6E-02 | 0.0E+00  | cDC | FBP1     |
| RNF130.3   | 0.0E+00  | 1.1E+00 | 4.4E-01 | 7.6E-02 | 0.0E+00  | cDC | RNF130   |
| FGD2.3     | 0.0E+00  | 1.1E+00 | 6.1E-01 | 4.1E-02 | 0.0E+00  | cDC | FGD2     |
| ASAP1.1    | 0.0E+00  | 1.1E+00 | 5.8E-01 | 7.4E-02 | 0.0E+00  | cDC | ASAP1    |
| SERPINF1.1 | 0.0E+00  | 1.1E+00 | 4.5E-01 | 8.0E-03 | 0.0E+00  | cDC | SERPINF1 |
| ETV6.5     | 0.0E+00  | 1.1E+00 | 6.4E-01 | 1.4E-01 | 0.0E+00  | cDC | ETV6     |
| KCNK6.1    | 0.0E+00  | 1.1E+00 | 6.0E-01 | 7.7E-02 | 0.0E+00  | cDC | KCNK6    |
| LILRB4.2   | 0.0E+00  | 1.1E+00 | 4.0E-01 | 2.9E-02 | 0.0E+00  | cDC | LILRB4   |
| FLT3.1     | 0.0E+00  | 1.1E+00 | 4.5E-01 | 5.0E-03 | 0.0E+00  | cDC | FLT3     |
| TNFSF13B.6 | 0.0E+00  | 1.1E+00 | 6.7E-01 | 1.3E-01 | 0.0E+00  | cDC | TNFSF13B |
| AHR.2      | 0.0E+00  | 1.0E+00 | 6.1E-01 | 1.2E-01 | 0.0E+00  | cDC | AHR      |
| C1QA.1     | 0.0E+00  | 1.0E+00 | 2.6E-01 | 1.6E-02 | 0.0E+00  | cDC | C1QA     |
| CLIC2      | 0.0E+00  | 1.0E+00 | 5.4E-01 | 6.0E-03 | 0.0E+00  | cDC | CLIC2    |
| ETS2.1     | 0.0E+00  | 1.0E+00 | 4.1E-01 | 5.0E-02 | 0.0E+00  | cDC | ETS2     |
| PKIB       | 0.0E+00  | 1.0E+00 | 3.6E-01 | 5.0E-03 | 0.0E+00  | cDC | PKIB     |
| PTMS.4     | 5.1E-273 | 1.0E+00 | 5.7E-01 | 1.3E-01 | 8.0E-269 | cDC | PTMS     |
| AP1S2.5    | 7.0E-269 | 1.1E+00 | 7.1E-01 | 2.0E-01 | 1.1E-264 | cDC | AP1S2    |
| CTSH.5     | 2.8E-261 | 1.2E+00 | 7.7E-01 | 2.5E-01 | 4.3E-257 | cDC | CTSH     |
| SAMHD1.6   | 3.6E-248 | 1.4E+00 | 8.7E-01 | 4.7E-01 | 5.6E-244 | cDC | SAMHD1   |
| TUBA1B.7   | 6.0E-245 | 1.7E+00 | 9.1E-01 | 5.8E-01 | 9.4E-241 | cDC | TUBA1B   |
| PPT1.2     | 4.0E-244 | 1.5E+00 | 7.5E-01 | 2.8E-01 | 6.2E-240 | cDC | PPT1     |
| LSP1.2     | 4.3E-224 | 1.1E+00 | 9.7E-01 | 8.9E-01 | 6.6E-220 | cDC | LSP1     |
| GABARAP.4  | 1.0E-223 | 1.0E+00 | 9.4E-01 | 8.2E-01 | 1.6E-219 | cDC | GABARAP  |
| PSAP.5     | 2.5E-211 | 1.3E+00 | 8.7E-01 | 5.1E-01 | 3.8E-207 | cDC | PSAP     |
| NAAA.1     | 5.4E-209 | 1.4E+00 | 6.1E-01 | 1.9E-01 | 8.5E-205 | cDC | NAAA     |
| SAT1.6     | 8.1E-200 | 1.1E+00 | 9.1E-01 | 5.9E-01 | 1.3E-195 | cDC | SAT1     |
| TYMP.6     | 2.1E-190 | 1.1E+00 | 7.2E-01 | 2.8E-01 | 3.3E-186 | cDC | TYMP     |
| RNH1.1     | 4.4E-185 | 1.1E+00 | 8.3E-01 | 4.2E-01 | 6.9E-181 | cDC | RNH1     |
| TUBA1A.5   | 7.6E-181 | 1.4E+00 | 8.4E-01 | 4.5E-01 | 1.2E-176 | cDC | TUBA1A   |
| C20orf27.1 | 9.3E-175 | 1.0E+00 | 5.2E-01 | 1.6E-01 | 1.5E-170 | cDC | C20orf27 |
| JAML.5     | 3.5E-167 | 1.3E+00 | 6.8E-01 | 2.9E-01 | 5.5E-163 | cDC | JAML     |
| SYNGR2.5   | 6.7E-165 | 1.4E+00 | 7.6E-01 | 3.8E-01 | 1.0E-160 | cDC | SYNGR2   |
| PPA1.2     | 1.3E-151 | 1.2E+00 | 7.8E-01 | 4.0E-01 | 2.0E-147 | cDC | PPA1     |
| AREG       | 1.0E-102 | 1.4E+00 | 1.6E-01 | 3.0E-02 | 1.6E-98  | cDC | AREG     |
| SNX3.5     | 1.2E-94  | 1.7E+00 | 7.3E-01 | 4.5E-01 | 1.8E-90  | cDC | SNX3     |
| FTH1.6     | 6.3E-91  | 1.1E+00 | 9.9E-01 | 9.2E-01 | 9.8E-87  | cDC | FTH1     |
| CPNE3.2    | 2.6E-88  | 1.1E+00 | 5.6E-01 | 2.7E-01 | 4.0E-84  | cDC | CPNE3    |
| COTL1.6    | 1.6E-72  | 1.0E+00 | 9.3E-01 | 7.1E-01 | 2.6E-68  | cDC | COTL1    |
| GNLY.8     | 0.0E+00  | 4.0E+00 | 7.1E-01 | 1.3E-01 | 0.0E+00  | NK  | GNLY     |
| XCL1.8     | 0.0E+00  | 3.4E+00 | 8.2E-01 | 6.6E-02 | 0.0E+00  | NK  | XCL1     |
| NKG7.7     | 0.0E+00  | 3.2E+00 | 9.7E-01 | 3.8E-01 | 0.0E+00  | NK  | NKG7     |

|          |          |         |         |         |          |    |         |
|----------|----------|---------|---------|---------|----------|----|---------|
| TYROBP.7 | 0.0E+00  | 3.2E+00 | 9.8E-01 | 8.4E-02 | 0.0E+00  | NK | TYROBP  |
| XCL2.1   | 0.0E+00  | 3.1E+00 | 7.3E-01 | 5.6E-02 | 0.0E+00  | NK | XCL2    |
| KLRC1    | 0.0E+00  | 3.1E+00 | 7.0E-01 | 2.0E-02 | 0.0E+00  | NK | KLRC1   |
| TRDC.2   | 0.0E+00  | 3.1E+00 | 7.6E-01 | 2.8E-02 | 0.0E+00  | NK | TRDC    |
| KLRD1.7  | 0.0E+00  | 3.1E+00 | 9.0E-01 | 1.0E-01 | 0.0E+00  | NK | KLRD1   |
| FCER1G.9 | 0.0E+00  | 2.8E+00 | 9.0E-01 | 6.8E-02 | 0.0E+00  | NK | FCER1G  |
| IL2RB.6  | 0.0E+00  | 2.7E+00 | 9.0E-01 | 3.5E-01 | 0.0E+00  | NK | IL2RB   |
| CTSW.9   | 0.0E+00  | 2.6E+00 | 9.4E-01 | 3.8E-01 | 0.0E+00  | NK | CTSW    |
| CLIC3.8  | 0.0E+00  | 2.6E+00 | 6.6E-01 | 1.3E-01 | 0.0E+00  | NK | CLIC3   |
| CMC1.6   | 0.0E+00  | 2.5E+00 | 7.4E-01 | 2.6E-01 | 0.0E+00  | NK | CMC1    |
| SH2D1B   | 0.0E+00  | 2.2E+00 | 5.7E-01 | 1.0E-03 | 0.0E+00  | NK | SH2D1B  |
| KLRC2.1  | 0.0E+00  | 2.1E+00 | 4.5E-01 | 3.2E-02 | 0.0E+00  | NK | KLRC2   |
| KLRF1    | 0.0E+00  | 2.1E+00 | 4.8E-01 | 4.0E-03 | 0.0E+00  | NK | KLRF1   |
| KLRC3.2  | 0.0E+00  | 2.0E+00 | 5.0E-01 | 3.5E-02 | 0.0E+00  | NK | KLRC3   |
| CD7.7    | 0.0E+00  | 2.0E+00 | 9.1E-01 | 5.5E-01 | 0.0E+00  | NK | CD7     |
| MATK.9   | 0.0E+00  | 1.9E+00 | 7.1E-01 | 2.0E-01 | 0.0E+00  | NK | MATK    |
| HOPX.8   | 0.0E+00  | 1.8E+00 | 7.7E-01 | 3.2E-01 | 0.0E+00  | NK | HOPX    |
| KLRK1.8  | 0.0E+00  | 1.8E+00 | 7.8E-01 | 2.1E-01 | 0.0E+00  | NK | KLRK1   |
| PRF1.8   | 0.0E+00  | 1.8E+00 | 8.1E-01 | 3.7E-01 | 0.0E+00  | NK | PRF1    |
| GZMB.7   | 0.0E+00  | 1.7E+00 | 4.2E-01 | 1.1E-01 | 0.0E+00  | NK | GZMB    |
| KRT86    | 0.0E+00  | 1.7E+00 | 3.2E-01 | 6.0E-03 | 0.0E+00  | NK | KRT86   |
| CCL3     | 0.0E+00  | 1.7E+00 | 2.8E-01 | 3.7E-02 | 0.0E+00  | NK | CCL3    |
| TMIGD2.1 | 0.0E+00  | 1.7E+00 | 4.8E-01 | 7.0E-02 | 0.0E+00  | NK | TMIGD2  |
| IGFBP2   | 0.0E+00  | 1.7E+00 | 3.0E-01 | 1.3E-02 | 0.0E+00  | NK | IGFBP2  |
| FGR.3    | 0.0E+00  | 1.6E+00 | 4.9E-01 | 6.6E-02 | 0.0E+00  | NK | FGR     |
| CD160    | 0.0E+00  | 1.6E+00 | 3.1E-01 | 1.3E-02 | 0.0E+00  | NK | CD160   |
| TXK.1    | 0.0E+00  | 1.6E+00 | 5.0E-01 | 7.6E-02 | 0.0E+00  | NK | TXK     |
| KIR2DL4  | 0.0E+00  | 1.5E+00 | 2.9E-01 | 2.0E-03 | 0.0E+00  | NK | KIR2DL4 |
| CD63.4   | 0.0E+00  | 1.5E+00 | 7.8E-01 | 4.3E-01 | 0.0E+00  | NK | CD63    |
| LAT2.5   | 0.0E+00  | 1.4E+00 | 4.2E-01 | 8.3E-02 | 0.0E+00  | NK | LAT2    |
| NCR1     | 0.0E+00  | 1.3E+00 | 3.4E-01 | 5.0E-03 | 0.0E+00  | NK | NCR1    |
| PTGDR.2  | 0.0E+00  | 1.3E+00 | 3.8E-01 | 6.3E-02 | 0.0E+00  | NK | PTGDR   |
| IFITM3.8 | 0.0E+00  | 1.3E+00 | 6.3E-01 | 1.6E-01 | 0.0E+00  | NK | IFITM3  |
| EOMES.7  | 0.0E+00  | 1.3E+00 | 4.6E-01 | 1.3E-01 | 0.0E+00  | NK | EOMES   |
| AOAH.7   | 0.0E+00  | 1.2E+00 | 5.0E-01 | 1.7E-01 | 0.0E+00  | NK | AOAH    |
| NCAM1    | 0.0E+00  | 1.2E+00 | 2.6E-01 | 3.0E-03 | 0.0E+00  | NK | NCAM1   |
| SRGN.4   | 0.0E+00  | 1.2E+00 | 9.7E-01 | 8.6E-01 | 0.0E+00  | NK | SRGN    |
| KRT81    | 0.0E+00  | 1.2E+00 | 2.3E-01 | 2.0E-03 | 0.0E+00  | NK | KRT81   |
| IFITM2.5 | 0.0E+00  | 1.2E+00 | 9.9E-01 | 9.1E-01 | 0.0E+00  | NK | IFITM2  |
| MCTP2    | 0.0E+00  | 1.2E+00 | 3.5E-01 | 6.1E-02 | 0.0E+00  | NK | MCTP2   |
| IFITM1.6 | 0.0E+00  | 1.2E+00 | 9.9E-01 | 9.4E-01 | 0.0E+00  | NK | IFITM1  |
| CST7.7   | 0.0E+00  | 1.1E+00 | 9.1E-01 | 6.3E-01 | 0.0E+00  | NK | CST7    |
| CXXC5.3  | 0.0E+00  | 1.1E+00 | 3.1E-01 | 3.7E-02 | 0.0E+00  | NK | CXXC5   |
| CAPN12   | 0.0E+00  | 1.1E+00 | 3.5E-01 | 8.4E-02 | 0.0E+00  | NK | CAPN12  |
| GSTP1.7  | 1.3E-306 | 1.3E+00 | 8.3E-01 | 5.7E-01 | 2.0E-302 | NK | GSTP1   |
| KLRB1.8  | 1.4E-294 | 1.2E+00 | 8.1E-01 | 4.1E-01 | 2.2E-290 | NK | KLRB1   |

|            |          |         |         |         |          |               |           |
|------------|----------|---------|---------|---------|----------|---------------|-----------|
| FASLG.7    | 2.2E-275 | 1.1E+00 | 3.4E-01 | 9.1E-02 | 3.4E-271 | NK            | FASLG     |
| CD38.3     | 2.5E-273 | 1.3E+00 | 4.6E-01 | 1.6E-01 | 3.9E-269 | NK            | CD38      |
| APMAP.4    | 2.5E-270 | 1.3E+00 | 5.8E-01 | 2.7E-01 | 4.0E-266 | NK            | APMAP     |
| AREG.1     | 2.8E-263 | 1.2E+00 | 1.8E-01 | 2.6E-02 | 4.3E-259 | NK            | AREG      |
| KLRC4.3    | 1.7E-238 | 1.0E+00 | 3.0E-01 | 7.5E-02 | 2.6E-234 | NK            | KLRC4     |
| CCL4.8     | 4.0E-235 | 1.4E+00 | 5.4E-01 | 2.3E-01 | 6.2E-231 | NK            | CCL4      |
| STARD3NL.2 | 2.7E-224 | 1.2E+00 | 4.0E-01 | 1.4E-01 | 4.2E-220 | NK            | STARD3NL  |
| CHST12.7   | 2.6E-202 | 1.1E+00 | 5.3E-01 | 2.6E-01 | 4.0E-198 | NK            | CHST12    |
| FCGR3A.1   | 4.8E-184 | 1.1E+00 | 1.9E-01 | 4.0E-02 | 7.6E-180 | NK            | FCGR3A    |
| CCL5.9     | 5.6E-181 | 1.3E+00 | 8.1E-01 | 6.5E-01 | 8.8E-177 | NK            | CCL5      |
| ID2.4      | 2.6E-176 | 1.1E+00 | 6.6E-01 | 4.1E-01 | 4.0E-172 | NK            | ID2       |
| CD300A.8   | 4.0E-171 | 1.1E+00 | 3.4E-01 | 1.3E-01 | 6.3E-167 | NK            | CD300A    |
| APOBEC3G.8 | 1.2E-146 | 1.0E+00 | 6.4E-01 | 4.4E-01 | 1.9E-142 | NK            | APOBEC3G  |
| MAPK1.2    | 5.7E-142 | 1.0E+00 | 3.9E-01 | 1.8E-01 | 8.9E-138 | NK            | MAPK1     |
| ITM2C.7    | 4.3E-129 | 1.4E+00 | 4.2E-01 | 2.1E-01 | 6.6E-125 | NK            | ITM2C     |
| CCL4L2.4   | 3.9E-128 | 1.2E+00 | 2.6E-01 | 8.9E-02 | 6.0E-124 | NK            | CCL4L2    |
| STMN1.4    | 0.0E+00  | 4.0E+00 | 9.7E-01 | 1.3E-01 | 0.0E+00  | Proliferating | STMN1     |
| TUBA1B.9   | 0.0E+00  | 3.2E+00 | 9.8E-01 | 5.9E-01 | 0.0E+00  | Proliferating | TUBA1B    |
| TYMS.1     | 0.0E+00  | 2.9E+00 | 8.2E-01 | 1.1E-02 | 0.0E+00  | Proliferating | TYMS      |
| RRM2.1     | 0.0E+00  | 2.7E+00 | 6.6E-01 | 3.0E-03 | 0.0E+00  | Proliferating | RRM2      |
| PCLAF.1    | 0.0E+00  | 2.6E+00 | 8.4E-01 | 1.8E-02 | 0.0E+00  | Proliferating | PCLAF     |
| HMGN2.1    | 0.0E+00  | 2.6E+00 | 9.8E-01 | 6.3E-01 | 0.0E+00  | Proliferating | HMGN2     |
| HMGB2.6    | 0.0E+00  | 2.6E+00 | 9.8E-01 | 5.0E-01 | 0.0E+00  | Proliferating | HMGB2     |
| MKI67.1    | 0.0E+00  | 2.5E+00 | 7.6E-01 | 1.5E-02 | 0.0E+00  | Proliferating | MKI67     |
| HIST1H2AI  | 0.0E+00  | 2.4E+00 | 4.7E-01 | 2.6E-02 | 0.0E+00  | Proliferating | HIST1H2AI |
| UBE2C      | 0.0E+00  | 2.4E+00 | 5.7E-01 | 3.0E-03 | 0.0E+00  | Proliferating | UBE2C     |
| TOP2A      | 0.0E+00  | 2.2E+00 | 6.7E-01 | 1.8E-02 | 0.0E+00  | Proliferating | TOP2A     |
| NUSAP1     | 0.0E+00  | 2.2E+00 | 6.7E-01 | 3.0E-02 | 0.0E+00  | Proliferating | NUSAP1    |
| HIST1H2AJ  | 0.0E+00  | 2.2E+00 | 4.4E-01 | 1.2E-02 | 0.0E+00  | Proliferating | HIST1H2AJ |
| HIST1H1B.1 | 0.0E+00  | 2.0E+00 | 4.8E-01 | 1.2E-02 | 0.0E+00  | Proliferating | HIST1H1B  |
| CENPF      | 0.0E+00  | 2.0E+00 | 6.6E-01 | 3.0E-02 | 0.0E+00  | Proliferating | CENPF     |
| PTTG1.5    | 0.0E+00  | 1.9E+00 | 8.3E-01 | 2.1E-01 | 0.0E+00  | Proliferating | PTTG1     |
| HIST1H3B   | 0.0E+00  | 1.9E+00 | 4.4E-01 | 2.0E-03 | 0.0E+00  | Proliferating | HIST1H3B  |
| CDK1       | 0.0E+00  | 1.8E+00 | 6.2E-01 | 1.0E-02 | 0.0E+00  | Proliferating | CDK1      |
| TK1.1      | 0.0E+00  | 1.8E+00 | 6.3E-01 | 1.4E-02 | 0.0E+00  | Proliferating | TK1       |
| H2AFX.1    | 0.0E+00  | 1.7E+00 | 6.9E-01 | 1.5E-01 | 0.0E+00  | Proliferating | H2AFX     |
| BIRC5.1    | 0.0E+00  | 1.7E+00 | 6.0E-01 | 3.0E-03 | 0.0E+00  | Proliferating | BIRC5     |
| ASPM       | 0.0E+00  | 1.7E+00 | 5.3E-01 | 8.0E-03 | 0.0E+00  | Proliferating | ASPM      |
| CKS2.1     | 0.0E+00  | 1.7E+00 | 7.0E-01 | 1.4E-01 | 0.0E+00  | Proliferating | CKS2      |
| PCNA       | 0.0E+00  | 1.7E+00 | 7.2E-01 | 1.2E-01 | 0.0E+00  | Proliferating | PCNA      |
| CKS1B      | 0.0E+00  | 1.7E+00 | 7.0E-01 | 9.1E-02 | 0.0E+00  | Proliferating | CKS1B     |
| MCM7.1     | 0.0E+00  | 1.6E+00 | 7.1E-01 | 9.2E-02 | 0.0E+00  | Proliferating | MCM7      |
| CENPM      | 0.0E+00  | 1.6E+00 | 7.0E-01 | 4.0E-02 | 0.0E+00  | Proliferating | CENPM     |
| HIST1H2AM  | 0.0E+00  | 1.6E+00 | 5.0E-01 | 8.2E-02 | 0.0E+00  | Proliferating | HIST1H2AM |
| ZWINT      | 0.0E+00  | 1.6E+00 | 7.0E-01 | 1.3E-02 | 0.0E+00  | Proliferating | ZWINT     |
| CDKN3.1    | 0.0E+00  | 1.6E+00 | 5.9E-01 | 1.8E-02 | 0.0E+00  | Proliferating | CDKN3     |

|            |          |         |         |         |          |               |           |
|------------|----------|---------|---------|---------|----------|---------------|-----------|
| HIST1H3C   | 0.0E+00  | 1.5E+00 | 3.7E-01 | 4.0E-03 | 0.0E+00  | Proliferating | HIST1H3C  |
| ASF1B      | 0.0E+00  | 1.5E+00 | 6.0E-01 | 1.0E-02 | 0.0E+00  | Proliferating | ASF1B     |
| CCNA2      | 0.0E+00  | 1.5E+00 | 5.3E-01 | 5.0E-03 | 0.0E+00  | Proliferating | CCNA2     |
| TPX2       | 0.0E+00  | 1.5E+00 | 5.8E-01 | 2.0E-02 | 0.0E+00  | Proliferating | TPX2      |
| CDC20.1    | 0.0E+00  | 1.4E+00 | 3.8E-01 | 2.0E-03 | 0.0E+00  | Proliferating | CDC20     |
| HIST1H2AL  | 0.0E+00  | 1.4E+00 | 3.4E-01 | 1.0E-02 | 0.0E+00  | Proliferating | HIST1H2AL |
| HMGB3.1    | 0.0E+00  | 1.4E+00 | 5.9E-01 | 2.7E-02 | 0.0E+00  | Proliferating | HMGB3     |
| CDT1       | 0.0E+00  | 1.4E+00 | 5.7E-01 | 8.0E-03 | 0.0E+00  | Proliferating | CDT1      |
| CCNB2      | 0.0E+00  | 1.4E+00 | 4.6E-01 | 4.0E-03 | 0.0E+00  | Proliferating | CCNB2     |
| FEN1       | 0.0E+00  | 1.4E+00 | 6.4E-01 | 5.4E-02 | 0.0E+00  | Proliferating | FEN1      |
| CLSPN      | 0.0E+00  | 1.4E+00 | 6.1E-01 | 1.3E-02 | 0.0E+00  | Proliferating | CLSPN     |
| LMNB1.2    | 0.0E+00  | 1.4E+00 | 7.6E-01 | 1.4E-01 | 0.0E+00  | Proliferating | LMNB1     |
| SMC4.1     | 0.0E+00  | 1.4E+00 | 7.3E-01 | 1.6E-01 | 0.0E+00  | Proliferating | SMC4      |
| KIFC1      | 0.0E+00  | 1.3E+00 | 5.5E-01 | 4.0E-03 | 0.0E+00  | Proliferating | KIFC1     |
| SMC2       | 0.0E+00  | 1.3E+00 | 7.0E-01 | 7.4E-02 | 0.0E+00  | Proliferating | SMC2      |
| UBE2T      | 0.0E+00  | 1.3E+00 | 6.5E-01 | 4.9E-02 | 0.0E+00  | Proliferating | UBE2T     |
| KPNA2.1    | 0.0E+00  | 1.3E+00 | 5.3E-01 | 9.0E-02 | 0.0E+00  | Proliferating | KPNA2     |
| GINS2      | 0.0E+00  | 1.3E+00 | 5.1E-01 | 1.7E-02 | 0.0E+00  | Proliferating | GINS2     |
| HIST1H3D   | 0.0E+00  | 1.3E+00 | 4.3E-01 | 4.9E-02 | 0.0E+00  | Proliferating | HIST1H3D  |
| MAD2L1     | 0.0E+00  | 1.3E+00 | 6.8E-01 | 7.6E-02 | 0.0E+00  | Proliferating | MAD2L1    |
| DHFR       | 0.0E+00  | 1.3E+00 | 6.1E-01 | 3.4E-02 | 0.0E+00  | Proliferating | DHFR      |
| CENPU      | 0.0E+00  | 1.3E+00 | 6.2E-01 | 2.4E-02 | 0.0E+00  | Proliferating | CENPU     |
| PKMYT1     | 0.0E+00  | 1.2E+00 | 5.0E-01 | 3.0E-03 | 0.0E+00  | Proliferating | PKMYT1    |
| MCM5.3     | 0.0E+00  | 1.2E+00 | 6.5E-01 | 1.2E-01 | 0.0E+00  | Proliferating | MCM5      |
| CCNB1      | 0.0E+00  | 1.2E+00 | 3.6E-01 | 1.3E-02 | 0.0E+00  | Proliferating | CCNB1     |
| TMEM106C.3 | 0.0E+00  | 1.2E+00 | 7.0E-01 | 1.5E-01 | 0.0E+00  | Proliferating | TMEM106C  |
| CDCA8      | 0.0E+00  | 1.2E+00 | 4.8E-01 | 9.0E-03 | 0.0E+00  | Proliferating | CDCA8     |
| PLK1       | 0.0E+00  | 1.2E+00 | 3.4E-01 | 5.0E-03 | 0.0E+00  | Proliferating | PLK1      |
| UHRF1      | 0.0E+00  | 1.2E+00 | 5.3E-01 | 4.0E-03 | 0.0E+00  | Proliferating | UHRF1     |
| CENPW.1    | 0.0E+00  | 1.2E+00 | 6.0E-01 | 2.5E-02 | 0.0E+00  | Proliferating | CENPW     |
| DLGAP5     | 0.0E+00  | 1.1E+00 | 4.1E-01 | 1.0E-03 | 0.0E+00  | Proliferating | DLGAP5    |
| HIST1H2AG  | 0.0E+00  | 1.1E+00 | 3.9E-01 | 3.9E-02 | 0.0E+00  | Proliferating | HIST1H2AG |
| AURKB      | 0.0E+00  | 1.1E+00 | 4.5E-01 | 4.0E-03 | 0.0E+00  | Proliferating | AURKB     |
| CDCA7      | 0.0E+00  | 1.1E+00 | 6.2E-01 | 8.5E-02 | 0.0E+00  | Proliferating | CDCA7     |
| ATAD2      | 0.0E+00  | 1.1E+00 | 6.4E-01 | 8.3E-02 | 0.0E+00  | Proliferating | ATAD2     |
| GTSE1      | 0.0E+00  | 1.1E+00 | 4.5E-01 | 2.0E-03 | 0.0E+00  | Proliferating | GTSE1     |
| KNL1       | 0.0E+00  | 1.1E+00 | 4.8E-01 | 1.5E-02 | 0.0E+00  | Proliferating | KNL1      |
| DTYMK      | 0.0E+00  | 1.0E+00 | 6.4E-01 | 8.2E-02 | 0.0E+00  | Proliferating | DTYMK     |
| EZH2       | 0.0E+00  | 1.0E+00 | 5.9E-01 | 6.6E-02 | 0.0E+00  | Proliferating | EZH2      |
| CDCA3      | 0.0E+00  | 1.0E+00 | 4.1E-01 | 3.0E-03 | 0.0E+00  | Proliferating | CDCA3     |
| MCM2       | 0.0E+00  | 1.0E+00 | 5.0E-01 | 2.3E-02 | 0.0E+00  | Proliferating | MCM2      |
| HMMR       | 0.0E+00  | 1.0E+00 | 3.9E-01 | 3.0E-03 | 0.0E+00  | Proliferating | HMMR      |
| HIST1H2AH  | 0.0E+00  | 1.0E+00 | 3.0E-01 | 1.2E-02 | 0.0E+00  | Proliferating | HIST1H2AH |
| TROAP      | 0.0E+00  | 1.0E+00 | 4.2E-01 | 4.0E-03 | 0.0E+00  | Proliferating | TROAP     |
| TUBB.3     | 1.3E-297 | 2.7E+00 | 9.7E-01 | 6.4E-01 | 2.1E-293 | Proliferating | TUBB      |
| H2AFZ.2    | 6.5E-297 | 2.0E+00 | 9.6E-01 | 6.5E-01 | 1.0E-292 | Proliferating | H2AFZ     |

|            |          |         |         |         |          |               |          |
|------------|----------|---------|---------|---------|----------|---------------|----------|
| GAPDH.4    | 4.6E-287 | 1.3E+00 | 1.0E+00 | 9.9E-01 | 7.2E-283 | Proliferating | GAPDH    |
| MCM3.1     | 1.4E-262 | 1.1E+00 | 6.5E-01 | 1.5E-01 | 2.3E-258 | Proliferating | MCM3     |
| FABP5.5    | 7.2E-261 | 1.4E+00 | 7.9E-01 | 2.4E-01 | 1.1E-256 | Proliferating | FABP5    |
| NUDT1.3    | 4.7E-260 | 1.1E+00 | 8.2E-01 | 2.4E-01 | 7.3E-256 | Proliferating | NUDT1    |
| DUT.3      | 1.6E-252 | 1.8E+00 | 8.8E-01 | 3.8E-01 | 2.5E-248 | Proliferating | DUT      |
| HIST1H1C.2 | 1.4E-244 | 1.6E+00 | 6.1E-01 | 1.4E-01 | 2.1E-240 | Proliferating | HIST1H1C |
| H2AFV.2    | 8.2E-240 | 1.5E+00 | 9.2E-01 | 4.4E-01 | 1.3E-235 | Proliferating | H2AFV    |
| CARHSP1.1  | 1.3E-239 | 1.2E+00 | 7.9E-01 | 2.4E-01 | 2.0E-235 | Proliferating | CARHSP1  |
| HMGB1.6    | 1.2E-238 | 1.3E+00 | 1.0E+00 | 9.3E-01 | 1.9E-234 | Proliferating | HMGB1    |
| TMPO.1     | 1.4E-232 | 1.3E+00 | 7.7E-01 | 2.3E-01 | 2.2E-228 | Proliferating | TMPO     |
| RPA3.1     | 3.3E-229 | 1.2E+00 | 8.4E-01 | 2.9E-01 | 5.1E-225 | Proliferating | RPA3     |
| KIF22.2    | 1.8E-221 | 1.0E+00 | 7.1E-01 | 2.0E-01 | 2.8E-217 | Proliferating | KIF22    |
| TUBA1C.4   | 1.2E-217 | 1.5E+00 | 7.3E-01 | 2.3E-01 | 1.8E-213 | Proliferating | TUBA1C   |
| TUBB4B.1   | 3.2E-204 | 1.9E+00 | 8.0E-01 | 3.2E-01 | 5.0E-200 | Proliferating | TUBB4B   |
| DEK.3      | 4.9E-199 | 1.3E+00 | 9.3E-01 | 5.0E-01 | 7.6E-195 | Proliferating | DEK      |
| NASP       | 3.5E-195 | 1.0E+00 | 7.6E-01 | 2.5E-01 | 5.4E-191 | Proliferating | NASP     |
| ACTB.9     | 2.1E-190 | 1.2E+00 | 1.0E+00 | 9.8E-01 | 3.2E-186 | Proliferating | ACTB     |
| PFN1.5     | 1.5E-186 | 1.0E+00 | 9.9E-01 | 8.8E-01 | 2.4E-182 | Proliferating | PFN1     |
| ANP32E     | 8.1E-183 | 1.1E+00 | 8.0E-01 | 3.0E-01 | 1.3E-178 | Proliferating | ANP32E   |
| RAN.3      | 4.9E-181 | 1.1E+00 | 9.6E-01 | 7.5E-01 | 7.6E-177 | Proliferating | RAN      |
| RANBP1.1   | 9.9E-179 | 1.2E+00 | 8.1E-01 | 3.3E-01 | 1.5E-174 | Proliferating | RANBP1   |
| SLC25A5.3  | 7.5E-172 | 1.1E+00 | 9.5E-01 | 6.6E-01 | 1.2E-167 | Proliferating | SLC25A5  |
| IDH2.5     | 4.7E-168 | 1.1E+00 | 8.8E-01 | 4.4E-01 | 7.3E-164 | Proliferating | IDH2     |
| TPI1.5     | 2.0E-164 | 1.2E+00 | 9.9E-01 | 8.2E-01 | 3.1E-160 | Proliferating | TPI1     |
| MT1E.4     | 6.0E-161 | 1.1E+00 | 7.3E-01 | 2.6E-01 | 9.4E-157 | Proliferating | MT1E     |
| ANP32B.4   | 6.0E-160 | 1.1E+00 | 9.5E-01 | 5.9E-01 | 9.3E-156 | Proliferating | ANP32B   |
| H2AFY.4    | 3.5E-159 | 1.0E+00 | 8.2E-01 | 3.3E-01 | 5.4E-155 | Proliferating | H2AFY    |
| CRIP1.5    | 1.2E-155 | 1.1E+00 | 9.9E-01 | 8.2E-01 | 1.8E-151 | Proliferating | CRIP1    |
| CALM3.4    | 3.4E-153 | 1.1E+00 | 9.3E-01 | 5.6E-01 | 5.2E-149 | Proliferating | CALM3    |
| PGAM1.4    | 1.9E-147 | 1.1E+00 | 9.3E-01 | 6.2E-01 | 3.0E-143 | Proliferating | PGAM1    |
| SLBP       | 3.8E-147 | 1.1E+00 | 7.0E-01 | 2.6E-01 | 6.0E-143 | Proliferating | SLBP     |
| LDHA.4     | 4.5E-144 | 1.1E+00 | 9.8E-01 | 8.3E-01 | 7.0E-140 | Proliferating | LDHA     |
| MT2A.7     | 7.7E-139 | 1.3E+00 | 9.4E-01 | 6.6E-01 | 1.2E-134 | Proliferating | MT2A     |
| VIM.7      | 3.0E-136 | 1.1E+00 | 1.0E+00 | 8.7E-01 | 4.7E-132 | Proliferating | VIM      |
| ENO1.7     | 4.3E-125 | 1.0E+00 | 9.8E-01 | 8.1E-01 | 6.7E-121 | Proliferating | ENO1     |
| JPT1.4     | 3.2E-122 | 1.1E+00 | 8.8E-01 | 5.0E-01 | 5.0E-118 | Proliferating | JPT1     |
| HIST1H1D.4 | 3.6E-120 | 1.3E+00 | 6.0E-01 | 2.2E-01 | 5.5E-116 | Proliferating | HIST1H1D |
| HIST1H4C.2 | 7.1E-111 | 3.0E+00 | 9.2E-01 | 7.1E-01 | 1.1E-106 | Proliferating | HIST1H4C |
| HIST1H1E.2 | 1.2E-101 | 1.8E+00 | 7.0E-01 | 3.2E-01 | 1.9E-97  | Proliferating | HIST1H1E |
| LGALS1.6   | 2.3E-96  | 1.4E+00 | 8.9E-01 | 5.5E-01 | 3.5E-92  | Proliferating | LGALS1   |
| ARL6IP1.4  | 6.9E-49  | 1.1E+00 | 8.1E-01 | 5.3E-01 | 1.1E-44  | Proliferating | ARL6IP1  |
