# Supplementary material for: Aqueous Macrophages Contribute to Conserved CCL2 and CXCL10 Gradients in Uveitis
Source: PubMed Central journal article supplement — Ophthalmol Sci. 2023 Dec 14;4(4):100453. doi: 10.1016/j.xops.2023.100453 (PMC11033188; doi:10.1016/j.xops.2023.100453), 2023-12-14
Supplement: mmc4.pdf [file mmc4.pdf]

**Supplemental table 3. Clinical Characteristics of Groups 1 and 2.**

|                | <b>Etiology</b> | <b>Anatomy</b> | <b>flare (days)</b> | <b>AC cell grade*</b> | <b>Local Therapy**</b> | <b>Systemic Therapy</b> |
|----------------|-----------------|----------------|---------------------|-----------------------|------------------------|-------------------------|
| <b>Group 1</b> |                 |                |                     |                       |                        |                         |
| UV186          | BSCR            | PanU           | 365                 | 0.5                   | 0                      | none                    |
| UV143          | JIA             | AU             | n/a                 | 2                     | 4                      | MTX, off ADA 1 week     |
| UV195          | VKH             | PanU           | 60                  | 1                     | 3                      | 40mg PDN, ADA for 1 w   |
| UV165          | Idiopathic      | PanU           | n/a                 | 2                     | 0                      | none                    |
| UV129          | VKH             | PanU           | 60                  | 1                     | 1                      | 20mg PDN, MTX and AL    |
| <b>Group 2</b> |                 |                |                     |                       |                        |                         |
| UV196          | Idiopathic      | AU_IU          | 7                   | 2                     | 4                      | none                    |
| UV019          | HLA_B27         | AU             | 9                   | 3                     | 8                      | none                    |
| UV213          | Idiopathic      | AU_IU          | 90                  | 1                     | 1                      | none                    |
| UV229          | Idiopathic      | PanU           | 90                  | 2                     | 2                      | hydroxychloroquine      |
| UV150          | Idiopathic      | AU_IU          | 90                  | 2                     | 2                      | none                    |
| UV180          | HLA_B27         | AU             | 7                   | 4                     | 8                      | none                    |
| UV132          | Idiopathic      | AU             | n/a                 | 3                     | 0                      | none                    |
| UV176          | BSCR            | PanU           | 30                  | 3                     | 0                      | none                    |
| UV160          | Idiopathic      | AU_IU          | 60                  | 3                     | 0                      | none                    |
| UV170          | Idiopathic      | PanU           | 8                   | 2                     | 4                      | none                    |
| UV215-03       | Idiopathic      | AU_IU          | 7                   | 2                     | 2                      | none                    |
| UV174          | Idiopathic      | AU_IU          | 30                  | 3                     | 0                      | none                    |
| UV284          | Idiopathic      | PanU           | 270                 | 1                     | 0                      | none                    |
| UV179          | HLA_B27         | AU             | 7                   | 2                     | 0                      | none                    |
| UV122          | HLA_B27         | AU             | 21                  | 3                     | 4                      | golimumab for 1 month   |
| UV027          | HLA_B27         | AU             | 3                   | 2                     | 0                      | ADA 1 month, 30mg PD    |
| UV031          | Idiopathic      | AU_IU          | 365                 | 2                     | 3                      | none                    |

Key: **BSCR** Birdshot chorioretinitis; **JIA** juvenile idiopathic arthritis; **VKH** Vogt-Koyanagi Harada disease; **PanU** panuveitis; **AU** anterior uveitis, **AU\_IU** anterior and intermediate uveitis; **AC** anterior chamber; \*based on the Standardization in Uveitis Nomenclature (SUN) criteria; \*\* approximate topical steroid dose (i.e. number of drops prednisolone/day); **MTX** methotrexate; **ADA** adalimumab; **PDN** prednisone
